# Supplementary material
Source: PubMed Central journal article supplement (PMC7816211)
Supplement: NIHMS1657602-supplement-2.pdf [file NIHMS1657602-supplement-2.pdf]

# Interferon Gamma Mediates Hematopoietic Stem Cell Activation and Niche Relocalization through BST2

## Graphical Abstract

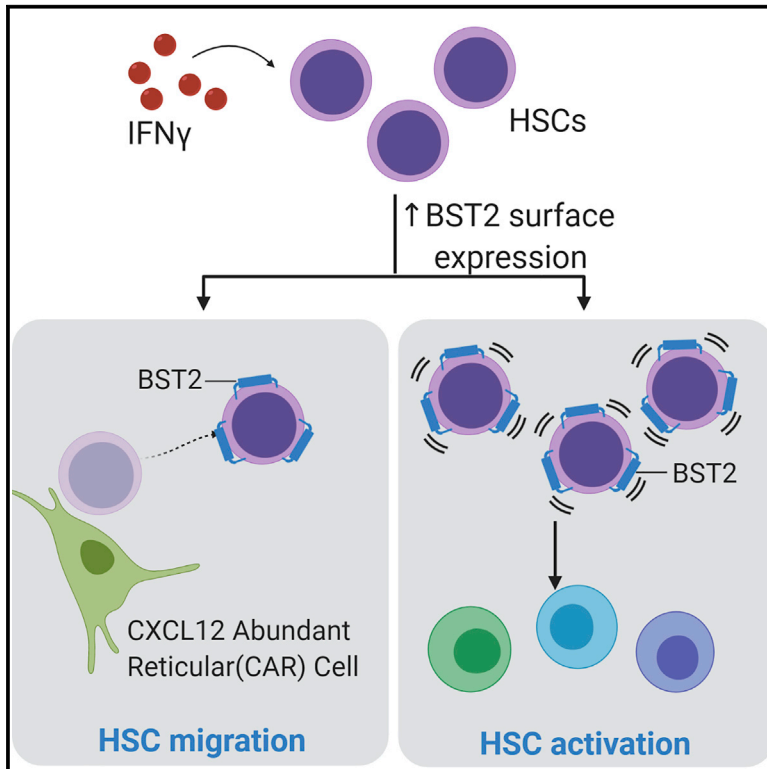

## Authors

Marcus A. Florez, Katie A. Matatall, Youngjae Jeong, ..., Marek Kimmel, Dongsu Park, Katherine Y. King

## Correspondence

dongsu.park@bcm.edu (D.P.),  
kyk@bcm.edu (K.Y.K.)

## In Brief

Florez et al. identify BST2 as a surface protein, induced by interferon gamma on hematopoietic stem cells, that is required for their relocalization and cell cycle activation in response to infection. BST2 may become an important target for enhancing stem cell homing and persistence in the face of inflammatory stress.

## Highlights

- Interferon gamma displaces hematopoietic stem cells in the bone marrow niche
- Stem cell relocalization is mediated by BST2, an E-selectin ligand
- *Bst2*<sup>-/-</sup> stem cells are hyperquiescent and resist depletion upon chronic infection

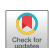

## Article

# Interferon Gamma Mediates Hematopoietic Stem Cell Activation and Niche Relocalization through BST2

Marcus A. Florez,<sup>1,9</sup> Katie A. Matatal,<sup>2,9</sup> Youngjae Jeong,<sup>3</sup> Laura Ortinau,<sup>3</sup> Paul W. Shafer,<sup>4,6</sup> Anne M. Lynch,<sup>5</sup> Roman Jaksik,<sup>7,8</sup> Marek Kimmel,<sup>7,8</sup> Dongsu Park,<sup>3,5,\*</sup> and Katherine Y. King<sup>2,4,5,6,10,\*</sup>

<sup>1</sup>Medical Scientist Training Program and Program in Translational Biology and Molecular Medicine, Baylor College of Medicine, Houston, TX 77030, USA

<sup>2</sup>Section of Infectious Disease, Department of Pediatrics, Baylor College of Medicine, Houston, TX 77030, USA

<sup>3</sup>Department of Human and Molecular Genetics, Baylor College of Medicine, Houston, TX 77030, USA

<sup>4</sup>Program in Immunology, Baylor College of Medicine, Houston, TX 77030, USA

<sup>5</sup>Program in Developmental Biology, Baylor College of Medicine, Houston, TX 77030, USA

<sup>6</sup>Dan L. Duncan Cancer Center and Center for Cell and Gene Therapy, Baylor College of Medicine, Houston, TX 77030, USA

<sup>7</sup>Department of Systems Biology and Engineering, Silesian University of Technology, Gliwice, Poland

<sup>8</sup>Department of Statistics, Rice University, Houston, TX 77030, USA

<sup>9</sup>These authors contributed equally

<sup>10</sup>Lead Contact

\*Correspondence: [dongsu.park@bcm.edu](mailto:dongsu.park@bcm.edu) (D.P.), [kyk@bcm.edu](mailto:kyk@bcm.edu) (K.Y.K.)

<https://doi.org/10.1016/j.celrep.2020.108530>

## SUMMARY

During chronic infection, the inflammatory cytokine interferon gamma (IFN $\gamma$ ) damages hematopoietic stem cells (HSCs) by disrupting quiescence and promoting excessive terminal differentiation. However, the mechanism by which IFN $\gamma$  hinders HSC quiescence remains undefined. Using intravital 3-dimensional microscopy, we find that IFN $\gamma$  disrupts the normally close interaction between HSCs and CXCL12-abundant reticular (CAR) cells in the HSC niche. IFN $\gamma$  stimulation increases expression of the cell surface protein BST2, which we find is required for IFN $\gamma$ -dependent HSC relocalization and activation. IFN $\gamma$  stimulation of HSCs increases their E-selectin binding by BST2 and homing to the bone marrow, which depends on E-selectin binding. Upon chronic infection, HSCs from mice lacking BST2 are more quiescent and more resistant to depletion than HSCs from wild-type mice. Overall, this study defines a critical mechanism by which IFN $\gamma$  promotes niche relocalization and activation in response to inflammatory stimulation and identifies BST2 as a key regulator of HSC quiescence.

## INTRODUCTION

The inflammatory cytokine interferon gamma (IFN $\gamma$ ) exerts powerful effects on hematopoietic stem and progenitor cells (HSPCs) (King and Goodell, 2011; Morales-Mantilla and King, 2018; Pietras, 2017). Patients with aplastic anemia, a disease characterized by loss of HSPCs and pancytopenia, have high levels of IFN $\gamma$  in their serum (Nisticò and Young, 1994; Young and Maciejewski, 1997). Similarly, infectious diseases such as hepatitis C and chronic mycobacterial infections that induce IFN $\gamma$ -mediated immune responses are associated with impaired hematopoiesis (Achi et al., 2013; Ramos-Casals et al., 2003; Scadden et al., 1989). However, the exact mechanisms by which IFN $\gamma$  damages hematopoiesis remain poorly defined.

In a recent study, we used a mouse model of chronic *Mycobacterium avium* infection to evaluate the mechanisms of stem cell loss during a chronic IFN $\gamma$ -mediated immune response (Matatal et al., 2016). We found that blood counts decline and HSCs are significantly depleted during chronic infection but

not through apoptosis or peripheral mobilization. Rather, chronic infection activates HSCs to divide by an IFN $\gamma$ -dependent mechanism (Baldrige et al., 2010; MacNamara et al., 2011), and this division occurs preferentially among myeloid-biased HSCs, which express higher levels of IFN $\gamma$  receptor (Ifngr1) (Matatal et al., 2014). Increased cell division translated to a net loss of HSCs because the divisions predominantly resulted in differentiation rather than self-renewal events. In summary, persistent IFN $\gamma$  exposure contributes to the loss of HSCs by triggering their division and excessive terminal differentiation.

Impaired HSC quiescence has also been observed upon IFN $\alpha$ , interleukin-1 (IL-1), lipopolysaccharide (LPS), tumor necrosis factor alpha (TNF- $\alpha$ ), and IL-6 stimulation in both mice and humans (Essers et al., 2009; King et al., 2015; Pietras et al., 2016; Schürch et al., 2014; Takizawa et al., 2017; Yamashita and Passequé, 2019). The dynamic nature of HSCs and the complexity of their microenvironment challenge our understanding of how chronic infections and inflammatory mediators induce the activation, differentiation, and loss of HSCs.

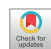

Interactions between HSCs and their bone marrow (BM) niche are an important determinant of HSC quiescence. CXCL12-abundant reticular (CAR) cells are BM perivascular stromal cells critical for the maintenance of HSC populations (Calvi and Link, 2015). Deletion of CXCL12 or its receptor CXCR4 or depletion of CAR cells leads to loss of HSC quiescence and depletion of HSCs over time (Nie et al., 2008; Sugiyama et al., 2006; Tzeng et al., 2011). Although the production of CXCL12 by early mesenchymal progenitors (a.k.a. perivascular stromal cells) and their interaction with HSCs have been reported to be particularly important for HSC maintenance (Ding and Morrison, 2013; Greenbaum et al., 2013), how chronic infections and inflammatory cytokines affect these interactions *in vivo* remains elusive.

To evaluate the fundamental question of how IFN $\gamma$  affects HSCs within the BM niche and HSC niche interactions, we used intravital imaging of HSCs in CXCL12-GFP knockin animals. We report that a surface-expressed protein called BST2 facilitates displacement of HSCs from proximity with quiescence-enforcing CAR cells and further demonstrate that BST2 is required for cell cycle activation of HSCs upon IFN $\gamma$  stimulation.

## RESULTS

### IFN $\gamma$ Increases the Distance between HSCs and CAR Cells by a Cell Autonomous Process

To evaluate how IFN $\gamma$  affects the interactions between HSC and CAR cells, we conducted sequential intravital imaging of HSCs in CXCL12-GFP transgenic mice with or without IFN $\gamma$  treatment and measured the distance between HSCs and CAR cells in living animals. Briefly, HSCs (lineage Sca1+ cKit+ CD150+ CD48<sup>-</sup>) were sorted from wild-type (WT) C57BL/6 mice and stained with cell-tracker 5-(and-6)-(((4-chloromethyl)benzoyl)amino)tetramethylrhodamine (CMTMR) dye. The labeled HSCs were then transplanted into irradiated CXCL12-GFP mice, and the calvaria of the recipient mice were imaged 24 h later to confirm homing into the BM. Consistent with previous studies, HSCs were located in close proximity to the CAR cells but were undetectable in the CAR cell-free BM cavity (Figure S1A). The same mice were then injected with either recombinant IFN $\gamma$ , TGF- $\beta$ , or PBS control. *In vivo* imaging of the mice 24 h later revealed that HSCs from IFN $\gamma$ -treated mice were significantly further away from CAR cells compared to those treated with PBS alone (Figures 1A and S1A). The difference in distance was several microns, similar to niche distancing effects that have been observed in other models of HSC activation (Christodoulou et al., 2020). In contrast, the HSCs remained in close proximity to the CAR cells when recipient CXCL12-GFP mice were treated with 100 ng TGF- $\beta$ , which is not known to induce HSC proliferation at this dose (Figure 1A).

To ascertain whether relocalization effects are cell autonomous, we transplanted HSCs from an *lfngr1*-deficient (*lfngr1*<sup>-/-</sup>) mouse into CXCL12-GFP mice. In contrast to WT HSCs, consecutive *in vivo* imaging of *lfngr1*<sup>-/-</sup> HSCs before and 24 h after IFN $\gamma$ -treatment revealed that these HSCs were not displaced from the CAR cells in response to IFN $\gamma$  (Figure 1B). These results indicate that IFN $\gamma$  acts to distance HSCs from quiescence-enforcing CAR cells by a cell autonomous mechanism.

Additionally, we treated donor mice with recombinant IFN $\gamma$  or PBS control 24 h prior to harvesting the HSCs. These HSCs were

then stained and injected to CXCL12-GFP recipient mice as described above. HSCs from mice that had been treated with recombinant murine IFN $\gamma$  for 24 h prior to harvest were located slightly further away from CAR cells compared to control HSCs, although the difference was not statistically significant (Figure S1B). These data support a cell autonomous effect of IFN $\gamma$  on HSCs but indicate that the effects of IFN $\gamma$  on HSC localization may be transient.

To test whether the distancing phenomenon is specific to IFN $\gamma$ , we transplanted WT CMTMR-labeled HSCs into a CXCL12-GFP recipient and treated the mice with a single intraperitoneal (i.p.) dose of polyinositic/polycytidylic acid (PIPC) to induce an IFN $\alpha$  response. Twenty-four h after PIPC induction, there was a trend toward increased distance between HSCs and CAR cells (Figure S1C), similar to the effects of IFN $\gamma$  and consistent with prior reports of niche relocalization upon IFN $\alpha$  stimulation (Kunisaki et al., 2013).

To assess the specificity of the IFN $\gamma$ -dependent relocalization response in the HSC compartment, we conducted a control experiment with CMTMR-stained CD19+ B cells, which also depend on CXCL12 signaling (Aurrand-Lions and Mancini, 2018). As shown in Figure S1D, the distances between B cells and CAR cells varied more widely than the distances between HSCs and CAR cells. Furthermore, there was no detectable change in the median distances between B cells and CAR cells after IFN $\gamma$  treatment (Figure S1E), supporting that its distancing effect is specific to the HSC compartment.

To exclude the impact of toxic effects of irradiation on distancing of HSCs from CAR cells after IFN $\gamma$  stimulation, we generated trigenic Krt18-CreER<sup>+</sup>Rosa26-Tomato<sup>+</sup>CXCL12-GFP<sup>+</sup> (Krt18/Tomato/CXCL12-GFP) mice. Consistent with a previous report (Chapple et al., 2018), we confirmed that a single tamoxifen treatment of Krt18-CreER<sup>+</sup>Rosa26-Tomato<sup>+</sup> mice induced selective labeling of CD48<sup>-</sup>CD150<sup>+</sup> HSCs (~72%) and CD48<sup>+</sup>CD150<sup>+</sup> HSPCs (~22%), whereas there was no detectable labeling in other populations (HPC1, HPC2, and multipotent progenitors [MPPs]) (Figure S1F). To measure the distance between endogenous steady-state HSCs and CAR cells, we conducted intravital 3-dimensional imaging of Krt18/Tomato/CXCL12-GFP mice at 24 h after a single dose of tamoxifen treatment. The mice were then retroorbitally injected with IFN $\gamma$  or TNF- $\alpha$ , another proinflammatory cytokine that promotes HSC cycling (Yamashita and Passegué, 2019). Notably, *in vivo* tracking of the same HSCs at 1 h and 24 h after IFN $\gamma$  treatment revealed that the majority of Krt18-Tomato<sup>+</sup> HSCs migrated away from the CAR cells, and the effects of TNF- $\alpha$  treatment were similar but did not reach statistical significance (Figures 1C and 1D). These results indicate that IFN $\gamma$  provides a powerful stimulus to endogenous HSCs and induces their distancing away from CAR cells even in the absence of irradiation.

### IFN $\gamma$ Exposure Increases BST2 Expression on HSCs

In order to determine whether impaired CXCL12 sensing contributed to IFN $\gamma$ -dependent distancing of HSCs from CAR cells, we measured expression of the CXCL12 receptor CXCR4 on HSCs in the presence and absence of IFN $\gamma$ . We found no change, either by mRNA or protein expression, in CXCR4 expression upon IFN $\gamma$  treatment (Figures 2A and 2B). We further conducted

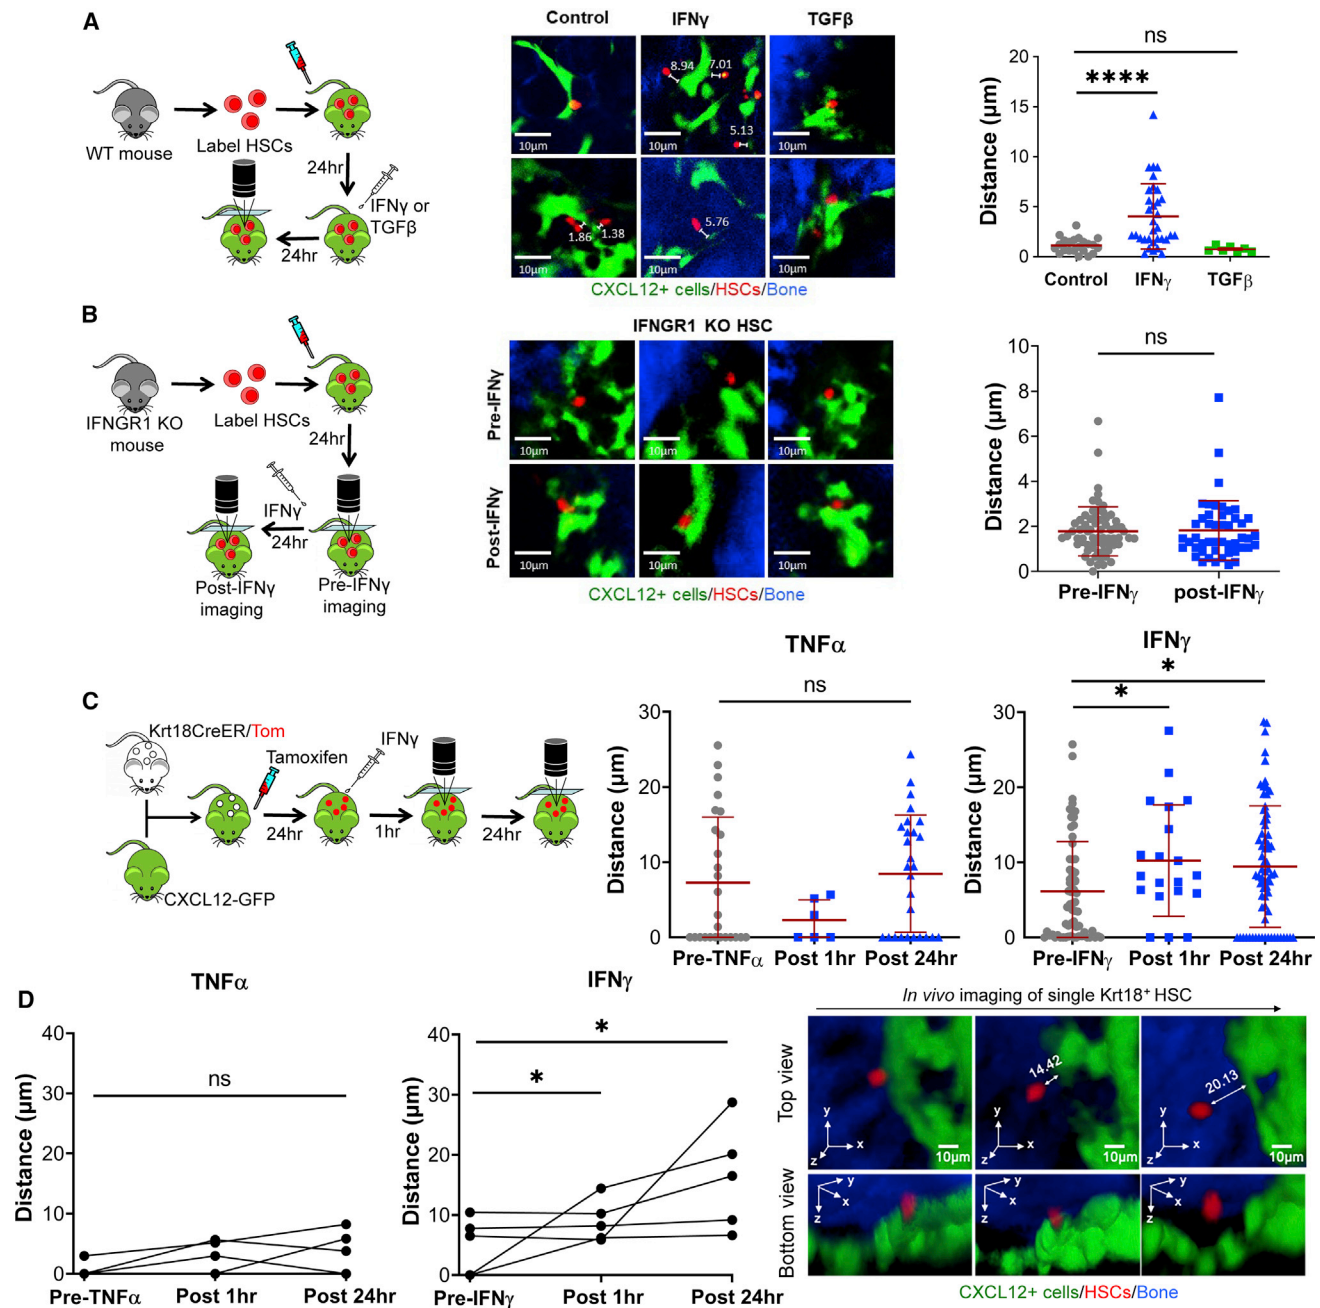

**Figure 1. IFN $\gamma$  Induces HSC Relocalization Away from CAR Cells**

(A and B) Intravital imaging of the calvarium of CXCL12-GFP mice transplanted with CMTMR-stained HSCs. Representative images show HSCs in red (CMTMR), CAR cells in green (GFP), and bone in blue. For quantification, each point represents a single CMTMR-stained HSC.

(A) Recipient CXCL12-GFP mice were treated with IFN $\gamma$  or TGF- $\beta$  following transplant, and mice were imaged 24 h after treatment. Distances shown are in  $\mu$ m. Mean distances: control, 1.12  $\mu$ m, n = 22; TGF- $\beta$ , 0.74  $\mu$ m, n = 7; IFN $\gamma$ , 4.03  $\mu$ m, n = 33. Data are compiled from 4 independent experiments.

(B) HSCs were isolated from *Ifngr1*<sup>-/-</sup> mice. Recipient CXCL12-GFP mice were imaged before (pre-IFN $\gamma$ ) and after treatment with IFN $\gamma$  (post-IFN $\gamma$ ) following transplant of labeled HSCs. n = 48–66. Mean distances: control, 1.78  $\mu$ m, n = 48; IFN $\gamma$ , 1.82  $\mu$ m, n = 66. Data are representative of 2 independent experiments.

(C) Intravital imaging of the calvarium of Krt18/Tom/CXCL12-GFP mice 24 h after a single dose of tamoxifen (50 mg/kg) and imaging of Krt18 $^+$  HSCs after IFN $\gamma$  or TNF- $\alpha$  treatment. n = 6–71. Mean distances: pre-TNF $\alpha$ , 7.28  $\mu$ m, n = 26; post-TNF $\alpha$  1 h, 2.30  $\mu$ m, n = 6; post-TNF- $\alpha$  24 h, 8.45  $\mu$ m, n = 27; pre-IFN $\gamma$ , 6.16  $\mu$ m, n = 64; post-IFN $\gamma$  1 h, 10.24  $\mu$ m, n = 20; post-IFN $\gamma$  24 h, 9.30  $\mu$ m, n = 71. Data are representative of 2 independent experiments.

(D) Change in distance of the same Krt18 $^+$  HSCs at the indicated time after TNF- $\alpha$  or IFN $\gamma$  treatment. Representative 3-dimensional images of a single Krt18 $^+$  HSC tracking at 24 h after tamoxifen (pre) or 1 h and 24 h after IFN $\gamma$  treatment. Scale bars are 10  $\mu$ m; A–C error bars are presented as mean  $\pm$  SD; \*p < 0.05, \*\*\*\*p < 0.0001; ns, not significant by Mann-Whitney test or Kruskal-Wallis test.



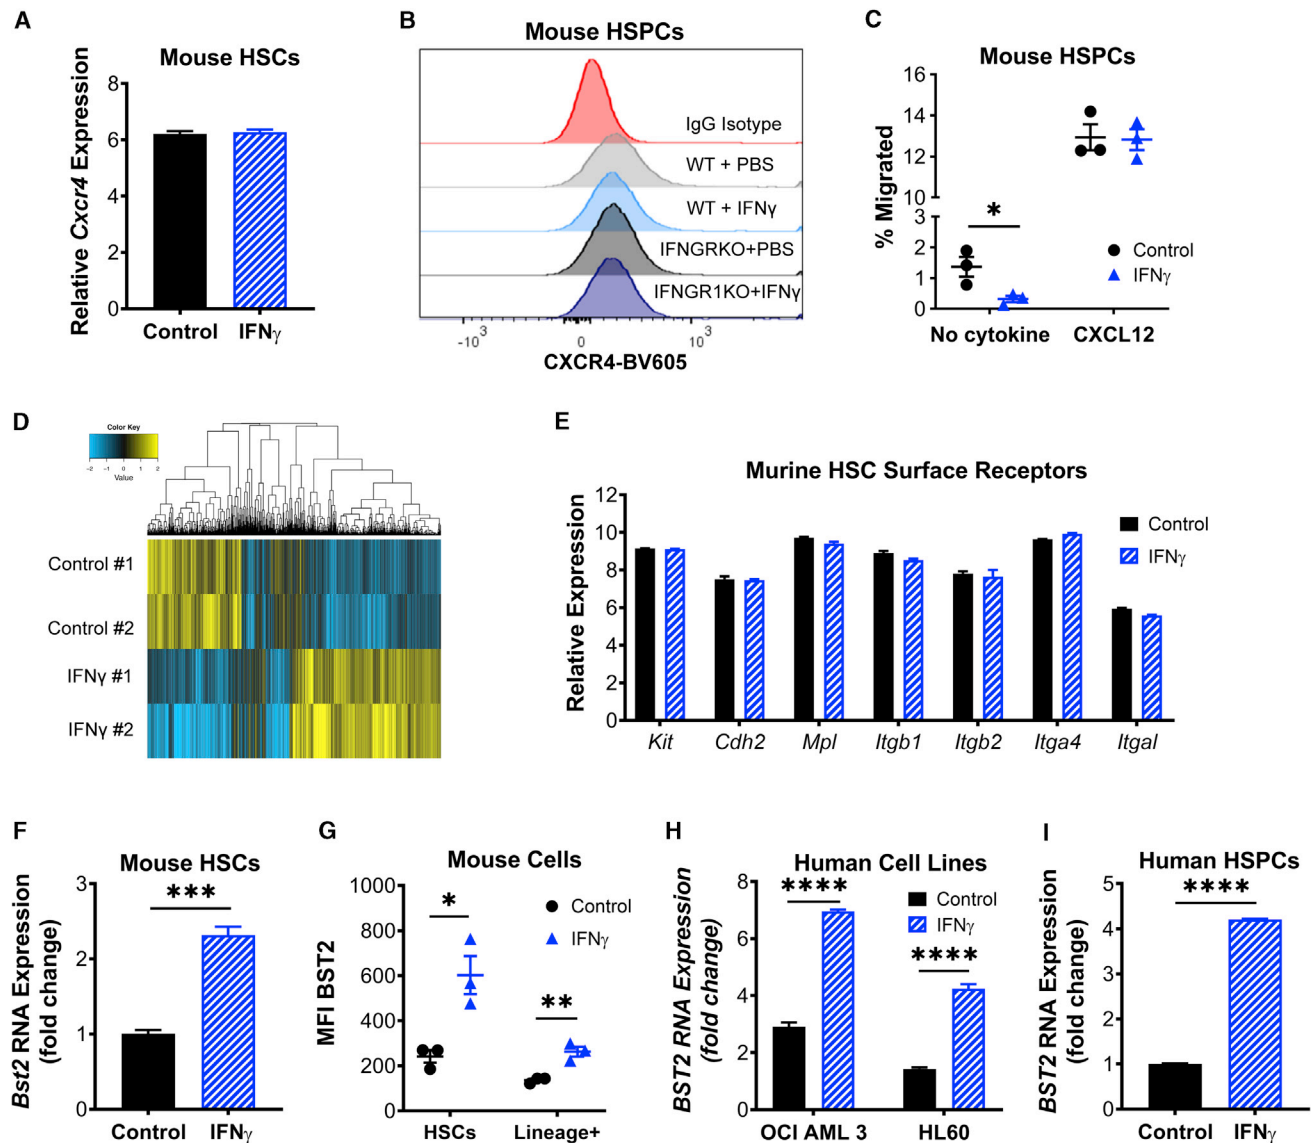

**Figure 2. IFN $\gamma$  Induces HSCs to Upregulate BST2**

(A) RNA expression level of *Cxcr4* in HSCs isolated from control or IFN $\gamma$ -treated mice, shown as relative expression.

(B) CXCR4 protein expression in HSPCs (cKIT $^+$  cells) isolated from wild-type (WT) or IFN $\gamma$  receptor knockout (IFN $\gamma$  RKO) mice that were treated with PBS or IFN $\gamma$ . Plot shows the mean fluorescence intensity (MFI) of antibody-stained cells.

(C) CXCL12 transwell migration assay of cKIT $^+$  cells isolated from control or IFN $\gamma$ -treated mice. Shown are the number of cells that migrated as a percentage of the total cells in both upper and lower chambers. Performed in triplicate; data are representative of 2 independent experiments.

(D) Heatmap of differentially expressed genes from expression profiling of HSCs from control or 24-h IFN $\gamma$ -treated mice. Fold change >1.5;  $p < 0.1$ .

(E) RNA expression level of HSC surface markers *Kit*, *Cdh2*, *Mpl*, *Itgb1*, *Itgb2*, *Itga4*, and *Itga1* in HSCs isolated from control or IFN $\gamma$ -treated mice, shown as relative expression.

(F) RNA expression level of *Bst2* in HSCs isolated from control or IFN $\gamma$ -treated mice, shown as fold change over control. Experiment was performed once in triplicate.

(G) Protein expression level of BST2 on HSCs and isolated from control or IFN $\gamma$ -treated mice. Data are shown as the MFI for surface BST2. Performed in triplicate; representative of 2 independent experiments.

(H) RNA expression level of *BST2* in control or IFN $\gamma$ -treated AML cell lines OCI-AML3 and HL60, shown as fold change over control. Experiment was performed once in triplicate.

(I) RNA expression level of *BST2* in control or 20-h IFN $\gamma$ -treated CD34 $^+$  HSPCs isolated from frozen cord blood, shown as fold change over control. Performed in triplicate; data are representative of 2 independent experiments. Error bars represent mean  $\pm$  SEM; \* $p < 0.05$ , \*\* $p < 0.01$ , \*\*\* $p < 0.001$ , \*\*\*\* $p < 0.0001$ ; ns, not significant by Student's *t*-test.

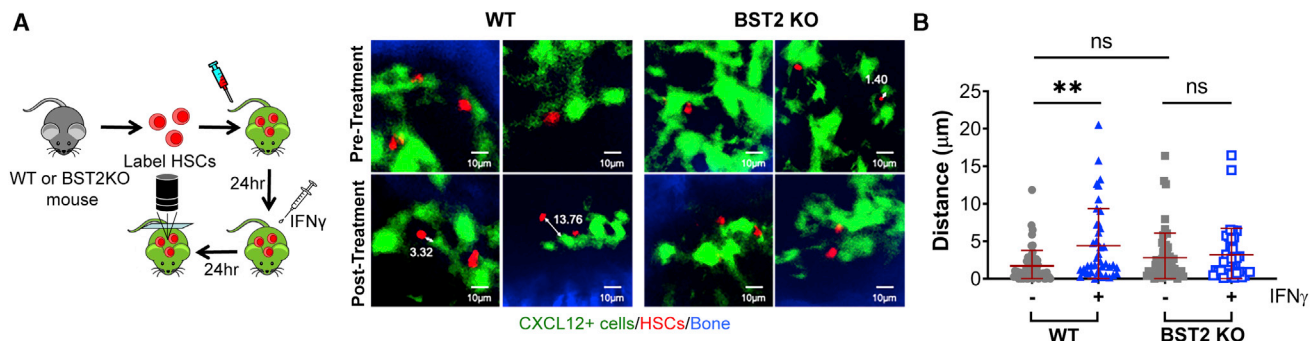

**Figure 3. Loss of BST2 Prevents IFN $\gamma$ -Mediated Relocalization**

(A and B) Representative imaging of WT versus *Bst2*<sup>-/-</sup> HSCs before or 24 h after systemic treatment with IFN $\gamma$ . Data are representative of 2 independent experiments with total n = 39–61 cells per group and were analyzed by Kruskal-Wallis one-way analysis of variance. Mean distances: WT control, 1.72  $\mu$ m, n = 61; WT IFN $\gamma$ , 4.40  $\mu$ m, n = 41; BST2 knockout (KO) control, 2.80  $\mu$ m, n = 56; BST2 KO IFN $\gamma$ , 3.18  $\mu$ m, n = 39. \*\*p < 0.01. Scale bars are 10  $\mu$ m; ns, not significant; error bars represent mean  $\pm$  SD.

functional studies to test migration of HSPCs toward CXCL12 following IFN $\gamma$  treatment in a transwell migration assay. Again, we saw no difference in the ability of HSCs to migrate toward CXCL12 upon IFN $\gamma$  stimulation (Figure 2C). Together, these data suggest that IFN $\gamma$  does not impair the ability of the HSCs to respond to CXCL12.

In order to investigate other potential mechanisms for HSC relocalization, we analyzed microarray data of HSCs from control or IFN $\gamma$ -treated mice and looked for cell surface proteins whose expression changed with 24-h IFN $\gamma$  treatment (Figure 2D). Consistent with a prior report (Umehoto et al., 2017), we found no IFN $\gamma$ -dependent changes in the expression levels of common HSC receptors thought to be important for maintaining HSC quiescence, including *cKit*, *Cdh2*, *Mpl*, *Itgb1*, *Itgb2*, *Itga4*, and *Itga1* (Figure 2E). Because *M. avium* infection also triggers HSC proliferation by an IFN $\gamma$ -dependent mechanism, we cross-referenced the microarray data with previously reported RNA sequencing data from control and *M. avium*-infected animals (Matatall et al., 2016) to find surface-expressed proteins with altered expression under both conditions. From the short list of upregulated proteins, we were able to validate increased expression of only one surface protein, BST2, also known as tetherin. *Bst2* mRNA expression was increased in HSCs by 2-fold upon IFN $\gamma$  treatment (Figure 2F), and BST2 protein levels were increased significantly in HSCs upon IFN $\gamma$  treatment, as confirmed by fluorescence-associated cell sorting (FACS) (Figure 2G). We verified that protein expression was elevated upon IFN $\gamma$  treatment in WT but not *Ifngr1*<sup>-/-</sup> host animals (Figure S2A). Of note, the increase in BST2 protein expression on HSCs was higher than on terminally differentiated cells of the mouse BM (Figure 2G). BST2 expression was also induced by IFN $\gamma$  in two human acute myelogenous leukemia (AML) cell lines, OCI AML3 and HL60 (Figures 2H and S2B), and in primary human CD34<sup>+</sup> HSPCs (Figure 2I).

### BST2 Is Required for IFN $\gamma$ -Dependent HSC Niche Relocalization

In order to determine whether BST2 is required to displace HSCs from CAR cells after *in vivo* IFN $\gamma$  stimulation, we con-

ducted intravital imaging of WT versus *Bst2*<sup>-/-</sup> HSCs in CXCL12-GFP transgenic mice before and after IFN $\gamma$  treatment. Most WT cells were displaced from CAR cells after IFN $\gamma$  treatment, whereas there was no change in distance of the *Bst2*<sup>-/-</sup> HSCs under the same conditions (Figures 3A, 3B, and S3A). These data indicate that BST2 is required for the displacement of HSCs from the CAR cell niche elicited by IFN $\gamma$  exposure.

Because we also noted distancing of HSCs from CAR cells in response to IFN $\alpha$ , we tested whether this displacement was dependent on BST2. Similar to the results of IFN $\gamma$  treatment, we found that there was no change in the distance of *Bst2*<sup>-/-</sup> HSCs after PIPC treatment (Figure S3B). These results suggest that niche relocalization in response to either IFN $\gamma$  or IFN $\alpha$  stimulation requires BST2.

### IFN $\gamma$ -Induced BST2 Facilitates E-Selectin Binding and Homing in Human and Murine HSCs

BST2 is an IFN $\gamma$ -induced cell surface protein that contributes to immunity by preventing the budding of viruses (Liberatore and Bieniasz, 2011) and has also been shown to facilitate endothelial binding of monocytes and lung epithelial progenitor cells (Lee et al., 2018; Yoo et al., 2011). Previous reports indicate that BST2 is a non-canonical E-selectin ligand (Julien et al., 2011). E-selectin has been characterized as a marker of vascular endothelial cells in an “activated” HSC niche, as mice lacking E-selectin have increased HSC quiescence (Winkler et al., 2012). However, prior studies indicated that canonical E-selectin ligands such as PSGL-1 and CD44 were not involved in this process and the HSC ligand for E-selectin has heretofore not been identified (Winkler et al., 2012).

To determine if IFN $\gamma$  affects E-selectin binding, we conducted *in vitro* binding assays by using cKit-enriched HSPCs. We found that HSPCs isolated from IFN $\gamma$ -treated mice indeed had increased E-selectin binding compared to control HSPCs by using both static and flow cytometric binding assays (Figures 4A and S4A). Meanwhile, IFN $\gamma$ -treated HSPCs did not show increased binding to P-selectin, a closely related selectin (Figure S4B).

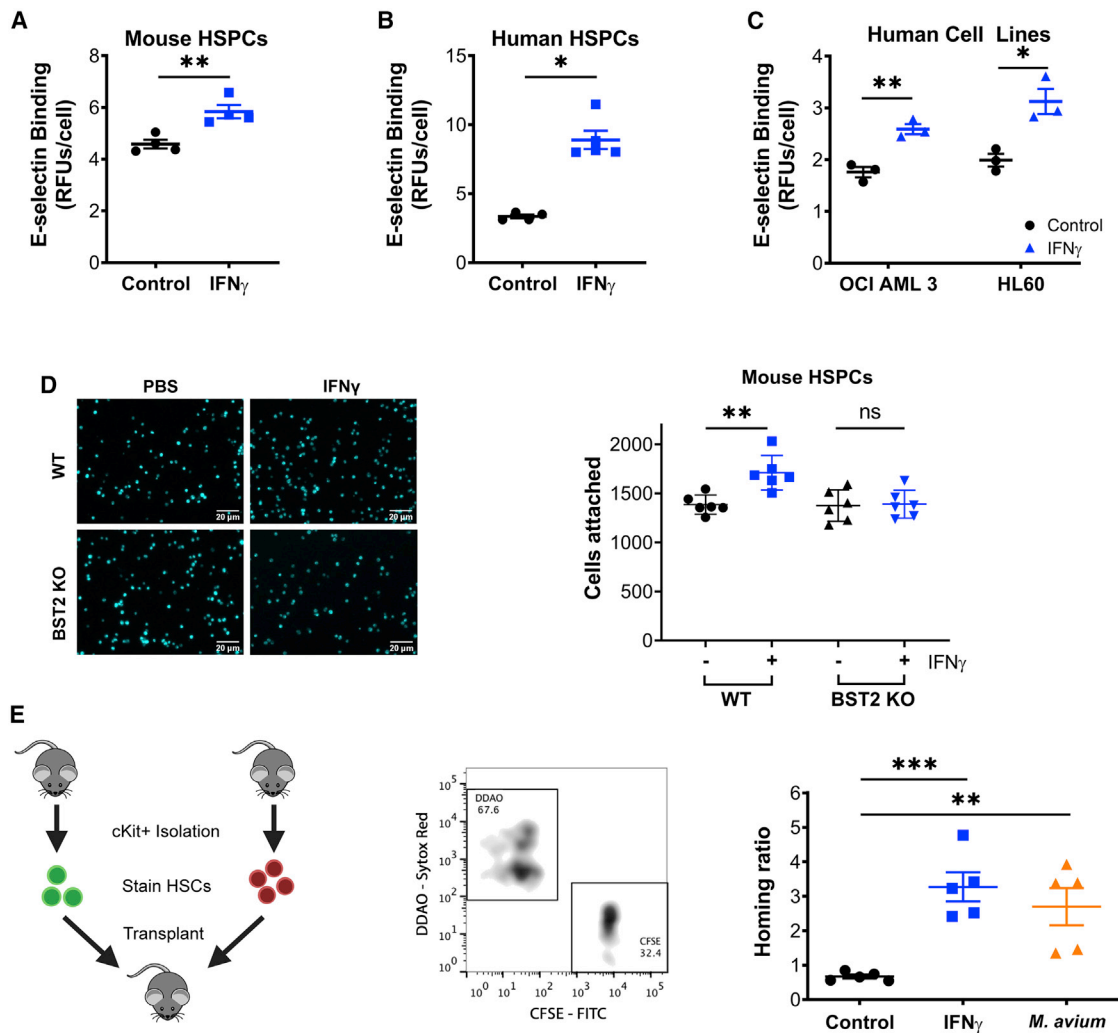

**Figure 4. IFN $\gamma$  Increases HSPC Binding to E-Selectin by BST2**

(A) *In vitro* E-selectin adhesion plate assay of cKit<sup>+</sup> progenitors isolated from control or IFN $\gamma$ -treated mice. Performed in triplicate; representative of 3 independent experiments.

(B) *In vitro* E-selectin adhesion plate assay of control or IFN $\gamma$ -treated human CD34<sup>+</sup> HSPCs. n = 5; representative of 2 independent experiments.

(C) *In vitro* E-selectin adhesion plate assay of control or IFN $\gamma$ -treated AML cell lines OCI-AML3 and HL60. n = 3; representative of 3 independent experiments. Data shown in (A)–(C) are normalized to background and reported in relative fluorescent units/cell.

(D) *In vitro* E-selectin adhesion plate assay of cKit<sup>+</sup> progenitors isolated from control or IFN $\gamma$ -treated *Bst2*<sup>-/-</sup> mice, with representative images and aggregate data. Each data point represents the average cell count of 4 high-powered fields of a separate well. Scale bars are 20 $\mu$ m. Data are representative of 2 independent experiments.

(E) Homing assays in which test marrow (carboxyfluorescein succinimidyl ester [CFSE] stained) was mixed with normal marrow (9H-(1,3-Dichloro-9,9-Dimethylacridin-2-One-7-yl) [DDAO] stained) before injection into recipient mice. Bone marrow was isolated 17 h later, and the ratio between the test and normal marrow was compared to the input ratio; shown as the homing ratio. Test marrow was from control, 24-h IFN $\gamma$  or 4-week *M. avium*-treated mice. n = 5 per group. Data are representative of 2 independent experiments. Error bars represent mean  $\pm$  SEM; \*p < 0.05, \*\*p < 0.01, \*\*\*p < 0.001.

To test the relevance of these findings in human cells, we treated both primary human CD34<sup>+</sup> HSPCs and AML cell lines OCI AML3 and HL60 with IFN $\gamma$  *in vitro* and again found increased E-selectin binding following IFN $\gamma$  treatment (Figures 4B and 4C). IFN $\gamma$  treatment did not change RNA expression of canonical E-selectin ligands *Gig1*, *Selplg*, and *Cd44* in mouse HSCs, indicating that a non-canonical ligand is likely involved (Figure S4C). Together, these data show that IFN $\gamma$  promotes E-selectin binding by HSCs, and they suggest that IFN $\gamma$  may induce

the relocalization of HSCs from the niche, possibly by inducing a higher binding affinity for E-selectin<sup>+</sup> endothelial cells.

To test whether BST2 is required for IFN $\gamma$ -induced HSC binding to E-selectin, we conducted E-selectin binding assays for WT versus *Bst2*<sup>-/-</sup> HSCs in the presence and absence of IFN $\gamma$ . The binding of WT but not *Bst2*<sup>-/-</sup> murine HSCs to E-selectin increased in the presence of IFN $\gamma$  (Figure 4D). We further used CRISPR-Cas9 gene editing with a combination of four single-guide RNAs to disrupt BST2 in primary human CD34<sup>+</sup> cells

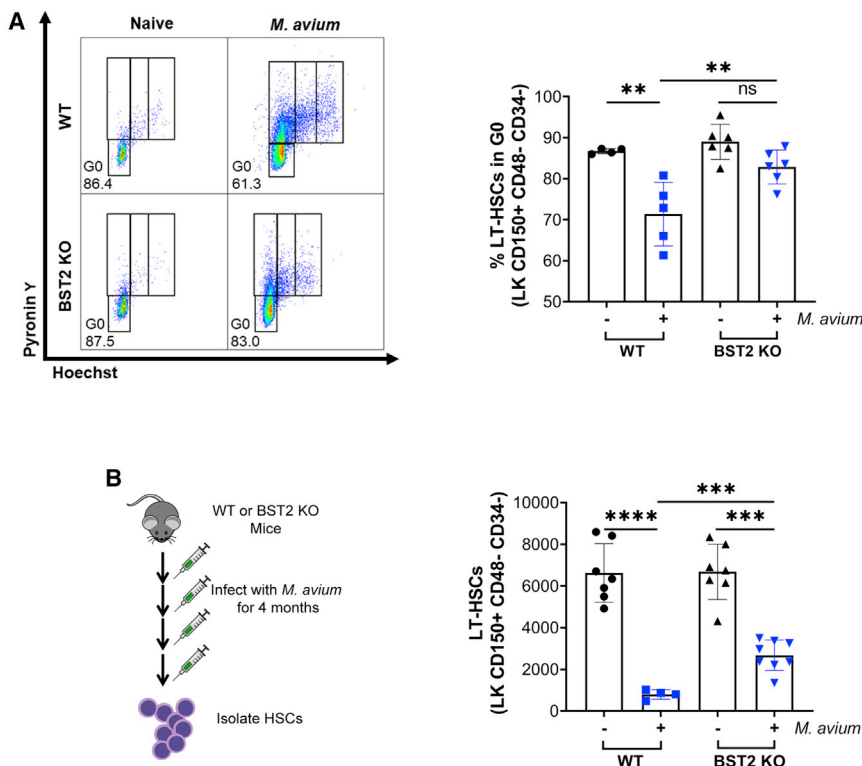

**Figure 5. BST2 Regulates HSC Quiescence and Maintenance**

(A) Representative flow plots of cell cycle analysis of HSCs using Hoechst pyronin Y. Bottom left gating indicates G0. Hoechst pyronin Y staining of HSCs isolated from WT or *Bst2*<sup>-/-</sup> naive or *M. avium*-infected mice. Shown as % of total HSCs (LK CD150+ CD48- CD34-) in G0. (B) LT-HSCs (LK CD150+ CD48- CD34-) per bone after 4 months of *M. avium* infection. \*p < 0.05, \*\*p < 0.01, \*\*\*p < 0.001, \*\*\*\*p < 0.0001. Error bars represent mean ± SD.

transplanted intrafemorally (Figure S4L), indicating no defect in stem cell viability and function. Collectively, these studies indicate that IFN $\gamma$  signaling promotes E-selectin binding through BST2 and contributes to appropriate HSC homing, possibly through E-selectin-mediated transendothelial migration.

### BST2 Is Required for IFN $\gamma$ -Dependent HSC Activation

To test the functional role of BST2 in HSC activation during infection, we infected WT or *Bst2*<sup>-/-</sup> mice with *M. avium*. At 1 month of infection, WT HSC quiescence

(Figure S4D). We confirmed efficient gene editing and protein reduction of BST2 by PCR and flow cytometry, respectively (Figures S4E and S4F). Using *in vitro* binding assays, we found that loss of BST2 significantly reduced the binding capacity of primary HSPCs for E-selectin (Figure S4G). Loss of BST2 also decreased the IFN $\gamma$ -induced E-selectin binding capacity of these cells, although it was not completely ablated (Figure S4H). Collectively, these studies suggest that BST2 is a critical mediator of IFN $\gamma$ -induced binding of HSCs to E-selectin.

E-selectin serves as an important mediator of vascular attachment and transendothelial migration of leukocytes and other hematopoietic cells. Adhesion through E-selectin allows cells to transition from rolling to “spreading activation” during this process (van Buul and Hordijk, 2004). Because transendothelial migration is a critical component of HSC homing, we assessed the effect of IFN $\gamma$  stimulation on HSC homing. By comparing the relative efficiency of CFSE-stained test cells versus DDAO-stained control cells to BM, we found that cKit<sup>+</sup> test cells from IFN $\gamma$ -treated animals homed to the BM with greater efficiency than untreated cKit<sup>+</sup> test cells. Similarly, cKit<sup>+</sup> test cells from *M. avium*-infected animals showed increased homing efficiency compared to untreated cells (Figure 4E). Conversely, cKit<sup>+</sup> cells from *Ifngr1*<sup>-/-</sup> animals had a decreased homing efficiency (Figure S4I). To confirm these findings, we conducted limiting dilution transplants of BM from WT versus *Ifngr1*<sup>-/-</sup> mice, as these studies do not depend on surface marker expression to measure stem cell content and homing. Consistent with a defect in homing, BM cells from *Ifngr1*<sup>-/-</sup> mice showed reduced long-term engraftment compared to those from WT mice (Figures S4J and S4K). Moreover, engraftment was identical if the BM was

was impaired, as evidenced by a decreased percentage of cells in G0 based on Hoechst/pyronin Y staining (Figure 5A). In contrast, *Bst2*<sup>-/-</sup> HSCs remained quiescent (~83% in G0) even in the setting of *M. avium* infection (Figure 5A). We confirmed that the infection was robust in both the WT and *Bst2*<sup>-/-</sup> mice, as shown by increased spleen weight and size (Figures S5A and S5B). These findings indicate that BST2 is essential for the activation of HSCs during chronic *M. avium* infection.

Because IFN $\gamma$ -mediated HSC activation and differentiation eventually result in HSC depletion after repeated *M. avium* infection, we hypothesized that *Bst2*<sup>-/-</sup> HSCs should be relatively protected from exhaustion during chronic infection. Therefore, we repeatedly infected WT and *Bst2*<sup>-/-</sup> mice with *M. avium* over the span of 4 months and measured HSC numbers at the end of this chronic infection. As expected, after 4 months of infection, WT HSCs were nearly completely depleted, whereas *Bst2*<sup>-/-</sup> HSCs were more preserved, with over 30% remaining compared to the uninfected group (Figures 5B and S5C). A similar pattern was noted for the MPP3 population (Figures S5D–S5G). These findings indicate that BST2 is critical for IFN $\gamma$ -mediated HSC activation and exhaustion of the HSC compartment in the setting of chronic infection.

### BST2 Regulates HSC Quiescence and Maintenance

Because baseline IFN $\gamma$  has been shown to affect HSC quiescence (Baldrige et al., 2010), we assessed the quiescence and maintenance of HSCs in *Bst2*<sup>-/-</sup> mice. Bromodeoxyuridine (BrdU) incorporation studies revealed that the HSCs from *Bst2*<sup>-/-</sup> mice were significantly more quiescent than HSCs of



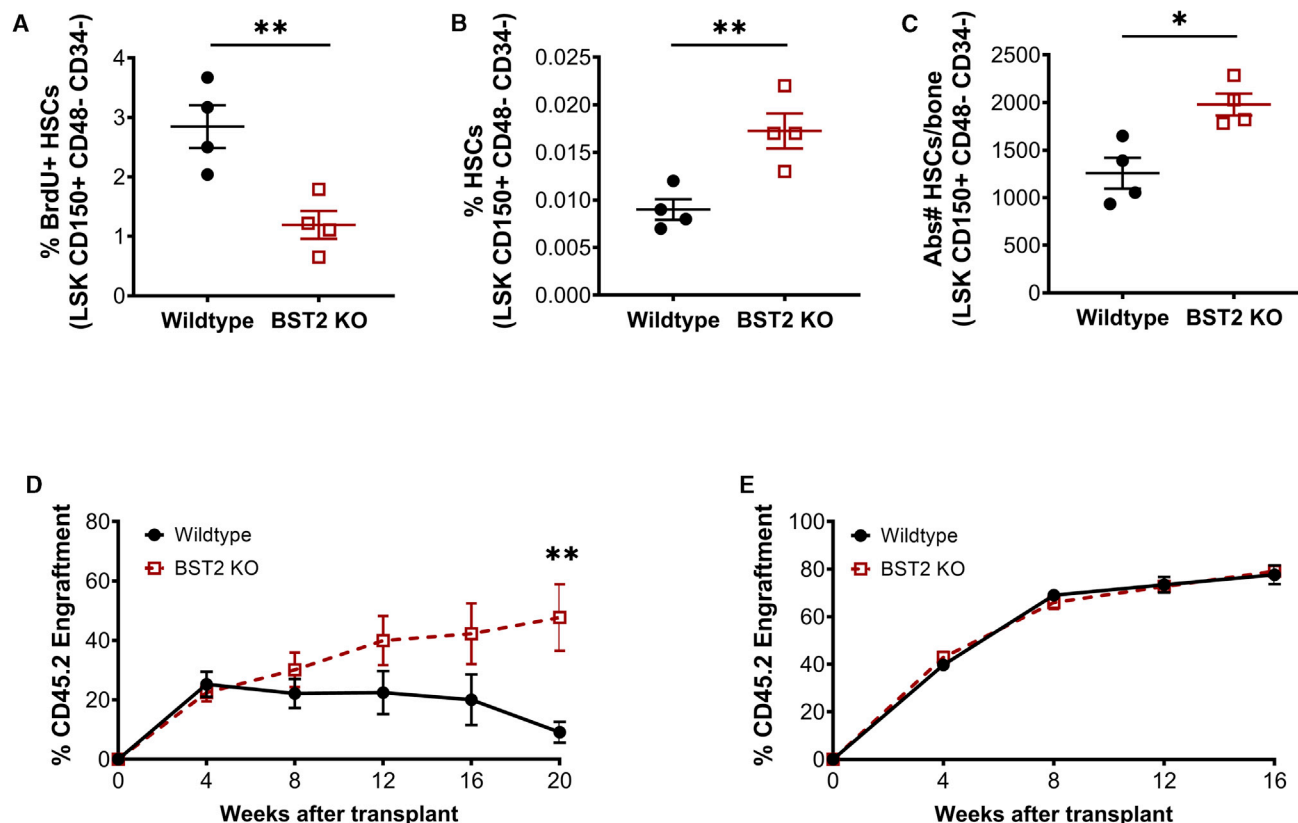

**Figure 6. Loss of BST2 Reduces HSC Proliferation and Increases HSC Numbers**

(A) BrdU+ HSCs isolated from WT or *Bst2*<sup>-/-</sup> mice. Shown as % of total HSCs (LSK CD150+ CD48- CD34-). n = 4; data are representative of 2 independent experiments.

(B and C) The number of HSCs in WT or *Bst2*<sup>-/-</sup> mice.

(B) The % of live WBM cells.

(C) Absolute number per bone. n = 4; Data are representative of 4 independent experiments.

(D) Total peripheral blood engraftment following transplant of 2 × 10<sup>5</sup> CD45.2 WT or *Bst2*<sup>-/-</sup> WBM cells mixed with 2 × 10<sup>5</sup> rescue marrow (CD45.1). n = 10.

(E) Total peripheral blood engraftment following transplant of 300 CD45.2 WT or *Bst2*<sup>-/-</sup> HSCs mixed with 2 × 10<sup>5</sup> rescue marrow (CD45.1). n = 10. Data are presented as mean ± SEM; \*p < 0.05, \*\*p < 0.01.

WT mice (Figures 6A and S6A), consistent with a role for BST2 in HSC cell cycle activation. Reduced BrdU incorporation was also noted in several classes of MPPs (Figures S6B–S6D). Furthermore, the overall number of HSCs was greater in *Bst2*<sup>-/-</sup> mice, both as a percentage of total BM cells and in absolute number (Figures 6B and 6C). The percentage of MPP1s and MPP2s were unchanged, whereas the percentage of MPP3s and MPP4s was higher in *Bst2*<sup>-/-</sup> mice than in WT mice (Figures S6E–S6G). Consistent with a greater number of HSCs in the BM, transplantation of whole BM from *Bst2*<sup>-/-</sup> mice into lethally irradiated WT recipients resulted in enhanced engraftment across all lineages compared to WT BM (Figures 6D and S6H–S6J). However, transplantation of an identical number of *Bst2*<sup>-/-</sup> versus WT HSCs resulted in equal levels of engraftment (Figure 6E), suggesting that the increased engraftment seen in the whole BM transplants was due to a greater number of HSCs rather than a cell autonomous advantage of *Bst2*<sup>-/-</sup> HSCs. Together, these data suggest a role for BST2 in HSC maintenance even during homeostatic conditions.

## DISCUSSION

Here, we demonstrated that IFN $\gamma$  displaces HSCs from quiescence-enforcing CAR cells in the niche. Furthermore, we found that the glycoprotein BST2 is upregulated on the surface of HSCs upon IFN $\gamma$  treatment and is required for IFN $\gamma$ -dependent displacement of HSCs from CAR cells. Although IFN $\gamma$  exposure does not interfere with normal CXCL12-CXCR4 interactions, induction of BST2 appears to be sufficient to overpower this chemoattractive relationship, resulting in displacement of HSCs away from CAR cells. Furthermore, we found that BST2 is required for the activation of HSC cell cycle activity and HSC exhaustion during chronic infection. Conversely, HSCs from *Bst2*<sup>-/-</sup> mice were increased in abundance and hyperquiescent, highlighting the role of BST2 in stem cell regulation even under steady-state conditions.

Our finding that IFN $\gamma$  stimulation resulted in distancing of HSCs from CAR cells mirrors findings of Kunisaki et al. (2013), who reported that polyinositol:polycytidylic-acid-induced IFN $\alpha$

stimulation increased the distance between HSCs and the quiescence-enforcing arteriolar niche. Recent live imaging studies support this dynamic localization by showing that activated HSCs were closer to the vasculature, with an average change in distance of  $\sim 1 \mu\text{m}$  (Christodoulou et al., 2020). Given prior reports that indicate that HSCs are normally in direct contact with vascular endothelial cells (Chen et al., 2016), even small changes in mean distance between HSCs and niche cells ( $1.12 \mu\text{m}$  to  $\sim 4 \mu\text{m}$  after  $\text{IFN}\gamma$  stimulation; Figure 1A) may have significant functional consequences.

HSC-niche interactions are an important determinant of HSC quiescence (Calvi and Link, 2015; Cordeiro Gomes et al., 2016). E-selectin is expressed in specialized locations within the BM and on small venule endothelial cells (Runnels et al., 2006). Winkler et al. (2012) showed that HSCs are more quiescent in the absence of E-selectin, suggesting that E-selectin preferentially marks an activated portion of the HSC niche. Indeed, our data indicate  $\text{IFN}\gamma$  increases the binding efficiency of HSCs for E-selectin but not to the closely related P-selectin, which does not play a role in HSC activation. Despite testing many of the canonical ligands for E-selectin binding, Winkler et al. (2012) never identified the ligand for E-selectin binding in the HSC niche. Our data provide evidence that BST2 is that ligand, as loss of BST2 in both murine and primary human cells significantly reduced binding to E-selectin. Furthermore, we found that HSCs lacking BST2 phenocopy the hyperquiescent phenotype of E-selectin KO HSCs. Based on these studies and our findings, we speculate that BST2 activates HSCs in part by promoting their relocalization toward an activated perisinusoidal niche.

Of note,  $\text{IFN}\alpha$  treatment also induces cell proliferation in HSCs and has been reported to upregulate BST2 (Bujanover et al., 2018). Thus, the mechanism we report here may be relevant to a number of inflammatory conditions beyond  $\text{IFN}\gamma$  exposure. Our methods do not provide the resolution of recent confocal microscopy studies (Kokkaliaris et al., 2020), and they do not allow us to comment on positioning of HSCs relative to various structures of the BM such as endosteum, which was recently reported to be important for maintaining reserve HSCs (Zhao et al., 2019). Future studies should assess how  $\text{IFN}\gamma$  exposure alters the interactions of HSCs with other niche cell types such as osteoblasts or macrophages.

Baseline E-selectin binding of primary human CD34+ cells was lower in BST2 mutant cells than in controls, but increased E-selectin binding upon  $\text{IFN}\gamma$  stimulation remained intact even in the mutants, suggesting that BST2 may not be the only ligand capable of mediating this interaction. It is important to note, however, that the human cells in these binding experiments were subject to the high stress conditions of  $\text{IFN}\gamma$  treatment *in vitro*, possibly inducing alternative binding mechanisms. Further *in vivo* studies are necessary to address the involvement of BST2 in  $\text{IFN}\gamma$ -induced E-selectin binding.

Given the link between  $\text{IFN}\gamma$ -induced BST2 expression and E-selectin binding and prior literature showing that E-selectin binding is a critical contributor to stem cell homing and engraftment (Krause et al., 2014), we hypothesized that  $\text{IFN}\gamma$  signaling may affect transendothelial migration and, thus, homing of HSCs. Indeed, we show that infections that induce  $\text{IFN}\gamma$ , as well as re-

combinant  $\text{IFN}\gamma$  alone, promote increased homing of HSCs to the BM from the peripheral circulation. Although others have speculated that infections can promote trafficking of HSPCs for immunosurveillance (Massberg et al., 2007), our prior data indicate that  $\text{IFN}\gamma$  is not a prime mediator of such migration (Baldridge et al., 2010; Matatall et al., 2014). These findings will be useful for interpreting BM transplant studies, as inflammatory cues may affect overall engraftment independent of intrinsic HSC function. The beneficial effects of  $\text{IFN}\gamma$  in HSC homing are likely offset by the negative effects in self-renewal, and further exploration of how  $\text{IFN}\gamma$  promotes homing of HSCs is worthy of pursuit. For example, these findings could have important implications for HSC transplant patients, especially those with inborn errors of immunity (Roesler et al., 2004).

Aside from BST2's role in HSC localization in the niche, we further found that BST2 is required for HSC cell cycle activation and depletion in the setting of chronic infection. *Bst2*<sup>-/-</sup> HSCs were uniformly more quiescent than WT HSCs even at baseline, suggesting that BST2 may have a cell autonomous role in regulating HSC quiescence. Indeed, BST2 has been reported to trigger nuclear factor  $\kappa\text{B}$  (NF- $\kappa\text{B}$ ) signaling in cancer cells (Liu et al., 2018). Whether BST2 activates NF- $\kappa\text{B}$  or other signaling pathways in HSCs will be the subject of future studies. In light of the above findings, modulating BST2 expression on HSCs may represent a previously unrecognized route to modify HSC homing, activation, and/or persistence in the setting of chronic inflammation. Recently, CCL2+ and HDC+ HSCs have been shown to be especially responsive to stress stimuli such as injury after myocardial infarction or LPS administration, respectively (Chen et al., 2017; Dutta et al., 2015). Whether these phenotypes also correlate with BST2 upregulation remains unknown. As we found that BST2 expression correlates with poor survival in patients with AML (LinkedOmics; Figure S6K), blocking BST2 binding may prove to be a strategy to limit leukemic stem cell proliferation. Further investigation of the mechanisms by which BST2 affects HSCs may thus have wide-ranging future implications for HSC biology and medicine.

## STAR★METHODS

Detailed methods are provided in the online version of this paper and include the following:

- KEY RESOURCES TABLE
- RESOURCE AVAILABILITY
  - Lead contact
  - Materials availability
  - Data and code availability
- EXPERIMENTAL MODEL AND SUBJECT DETAILS
  - Animals
  - Microbial infections
  - Cell lines
  - Primary cell cultures
- METHOD DETAILS
  - Limiting dilution transplants
  - *Bst2*<sup>-/-</sup> Transplants
  - Homing assays
  - Intrafemoral transplants

- Intravital imaging of cell-niche interactions
- RNA purification and realtime PCR
- **PRIMER SEQUENCES**
  - Flow cytometry
  - CXCR4 expression analysis
  - Selectin binding assays
  - Transwell migration assay
  - CRISPR deletion
  - Gene expression profiling
  - BrdU incorporation
  - Hoechst Pyronin Y
- **QUANTIFICATION AND STATISTICAL ANALYSIS**

### SUPPLEMENTAL INFORMATION

Supplemental Information can be found online at <https://doi.org/10.1016/j.celrep.2020.108530>.

A video abstract is available at <https://doi.org/10.1016/j.celrep.2020.108530#mmc3>.

### ACKNOWLEDGMENTS

The authors would like to thank T. Horton for sharing research equipment, D. Nakada for sharing Krt18 reporter mice, F. Lam for assistance with binding assays, and C. Gillespie for critical reading of the manuscript. This project depended on the support of Joel Sederstrom and the BCM Cytometry and Cell Sorting Core with funding from the NIH (NCRR grant S10RR024574, NIAID grant AI036211, and NCI grant P30CA125123), NIH grant S10 OD020066, and the Dan L. Duncan Cancer Center, as well as help from Lisa White and the genomic and RNA profiling core at Baylor College of Medicine, with funding from the NIH (NIDDK-DK56338 and NCI-CA125123). This project was also supported by the BCM Integrated Microscopy Core with funding from the NIH (HD007495, DK56338, and CA125123), the Dan L. Duncan Cancer Center, and the John S. Dunn Gulf Coast Consortium for Chemical Genomics. K.Y.K., M.A.F., and K.A.M. were supported by the NIH grants R01HL136333 and R01HL134880 (K.Y.K.) and T32DK060445 (K.A.M. and M.A.F.), the Aplastic Anemia and MDS International Foundation Liviya Anderson Award (K.Y.K.), and a March of Dimes Basil O'Connor Starter Scholar Award (K.Y.K.). R.J. and M.K. were supported by the Polish National Science Centre grants 2016/23/D/ST7/03665 and 2018/29/B/ST7/02550, respectively. D.P., L.O., and Y.J. were supported by the NIH grants R01AR072018 (D.P., Y.J., and L.O.), R01CA221946 (D.P. and Y.J.), and R21AG064345 (D.P.).

AML survival data are based upon data generated by the TCGA Research Network: <https://www.cancer.gov/about-nci/organization/ccg/research/structural-genomics/tcga>.

### AUTHOR CONTRIBUTIONS

M.A.F., K.A.M., and K.Y.K. designed and conducted experiments and wrote the paper. L.O., Y.J., and D.P. conducted intravital microscopy of HSCs and performed image analysis. P.W.S. and A.M.L. conducted CRISPR and E-selectin binding experiments. R.J. and M.K. conducted microarray analysis.

### DECLARATION OF INTERESTS

The authors declare no competing interests.

Received: September 13, 2019  
Revised: September 17, 2020  
Accepted: November 24, 2020  
Published: December 22, 2020

### REFERENCES

- Achi, H.V., Ahui, B.J., Anon, J.C., Kouassi, B.A., Dje-Bi, H., and Kininman, H. (2013). [Pancytopenia: a severe complication of miliary tuberculosis]. *Rev. Mal. Respir.* 30, 33–37.
- Aurrand-Lions, M., and Mancini, S.J.C. (2018). Murine Bone Marrow Niches from Hematopoietic Stem Cells to B Cells. *Int. J. Mol. Sci.* 19, 2353.
- Baldrige, M.T., King, K.Y., Boles, N.C., Weksberg, D.C., and Goodell, M.A. (2010). Quiescent haematopoietic stem cells are activated by IFN- $\gamma$  in response to chronic infection. *Nature* 465, 793–797.
- Bujanover, N., Goldstein, O., Greenshpan, Y., Turgeman, H., Klainberger, A., Scharff, Y., and Gazit, R. (2018). Identification of immune-activated hematopoietic stem cells. *Leukemia* 32, 2016–2020.
- Calvi, L.M., and Link, D.C. (2015). The hematopoietic stem cell niche in homeostasis and disease. *Blood* 126, 2443–2451.
- Chapple, R.H., Tseng, Y.J., Hu, T., Kitano, A., Takeichi, M., Hoegenauer, K.A., and Nakada, D. (2018). Lineage tracing of murine adult hematopoietic stem cells reveals active contribution to steady-state hematopoiesis. *Blood Adv.* 2, 1220–1228.
- Chen, J.Y., Miyanishi, M., Wang, S.K., Yamazaki, S., Sinha, R., Kao, K.S., Seita, J., Sahoo, D., Nakauchi, H., and Weissman, I.L. (2016). Hoxb5 marks long-term haematopoietic stem cells and reveals a homogenous perivascular niche. *Nature* 530, 223–227.
- Chen, X., Deng, H., Churchill, M.J., Luchsinger, L.L., Du, X., Chu, T.H., Friedman, R.A., Middelhoff, M., Ding, H., Taylor, Y.H., et al. (2017). Bone Marrow Myeloid Cells Regulate Myeloid-Biased Hematopoietic Stem Cells via a Histamine-Dependent Feedback Loop. *Cell Stem Cell* 21, 747–760.e7.
- Christodoulou, C., Spencer, J.A., Yeh, S.A., Turcotte, R., Kokkalis, K.D., Panero, R., Ramos, A., Guo, G., Seyedhassantehrani, N., Espinosa, T.V., et al. (2020). Live-animal imaging of native haematopoietic stem and progenitor cells. *Nature* 578, 278–283.
- Cordeiro Gomes, A., Hara, T., Lim, V.Y., Herndler-Brandstetter, D., Nevius, E., Sugiyama, T., Tani-Ichi, S., Schlenner, S., Richie, E., Rodewald, H.-R., et al. (2016). Hematopoietic Stem Cell Niches Produce Lineage-Instructive Signals to Control Multipotent Progenitor Differentiation. *Immunity* 45, 1219–1231.
- Ding, L., and Morrison, S.J. (2013). Hematopoietic stem cells and early lymphoid progenitors occupy distinct bone marrow niches. *Nature* 495, 231–235.
- Dutta, P., Sager, H.B., Stengel, K.R., Naxerova, K., Courties, G., Saez, B., Silberstein, L., Heidt, T., Sebas, M., Sun, Y., et al. (2015). Myocardial Infarction Activates CCR2(+) Hematopoietic Stem and Progenitor Cells. *Cell Stem Cell* 16, 477–487.
- Essers, M.A.G., Offner, S., Blanco-Bose, W.E., Waibler, Z., Kalinke, U., Duchosal, M.A., and Trumpp, A. (2009). IFN $\alpha$  activates dormant hematopoietic stem cells in vivo. *Nature* 458, 904–908.
- Feng, C.G., Zheng, L., Jankovic, D., Báfica, A., Cannons, J.L., Watford, W.T., Chaussabel, D., Hieny, S., Caspar, P., Schwartzberg, P.L., et al. (2008). The immunity-related GTPase Irgm1 promotes the expansion of activated CD4+ T cell populations by preventing interferon- $\gamma$ -induced cell death. *Nat. Immunol.* 9, 1279–1287.
- Greenbaum, A., Hsu, Y.-M.S., Day, R.B., Schuettpeiz, L.G., Christopher, M.J., Borgerding, J.N., Nagasawa, T., and Link, D.C. (2013). CXCL12 in early mesenchymal progenitors is required for haematopoietic stem-cell maintenance. *Nature* 495, 227–230.
- Hu, Y., and Smyth, G.K. (2009). ELDA: extreme limiting dilution analysis for comparing depleted and enriched populations in stem cell and other assays. *J. Immunol. Methods* 347, 70–78.
- Julien, S., Ivetic, A., Grigoriadis, A., QiZe, D., Burford, B., Sproviero, D., Picco, G., Gillett, C., Papp, S.L., Schaffer, L., et al. (2011). Selectin ligand sialyl-Lewis x antigen drives metastasis of hormone-dependent breast cancers. *Cancer Res.* 71, 7683–7693.

- King, K.Y., and Goodell, M.A. (2011). Inflammatory modulation of HSCs: viewing the HSC as a foundation for the immune response. *Nat. Rev. Immunol.* **11**, 685–692.
- King, K.Y., Matatall, K.A., Shen, C.-C., Goodell, M.A., Swierczek, S.I., and Prchal, J.T. (2015). Comparative long-term effects of interferon  $\alpha$  and hydroxyurea on human hematopoietic progenitor cells. *Exp. Hematol.* **43**, 912–918.e2.
- Kokkaliaris, K.D., Kunz, L., Cabezas-Wallscheid, N., Christodoulou, C., Renders, S., Camargo, F., Trumpp, A., Scadden, D.T., and Schroeder, T. (2020). Adult blood stem cell localization reflects the abundance of reported bone marrow niche cell types and their combinations. *Blood* **136**, 2296–2307.
- Krause, D.S., Lazarides, K., Lewis, J.B., von Andrian, U.H., and Van Etten, R.A. (2014). Selectins and their ligands are required for homing and engraftment of BCR-ABL1+ leukemic stem cells in the bone marrow niche. *Blood* **123**, 1361–1371.
- Kunisaki, Y., Bruns, I., Scheiermann, C., Ahmed, J., Pinho, S., Zhang, D., Mizoguchi, T., Wei, Q., Lucas, D., Ito, K., et al. (2013). Arteriolar niches maintain haematopoietic stem cell quiescence. *Nature* **502**, 637–643.
- Lee, B.N.R., Chang, H.K., Son, Y.S., Lee, D., Kwon, S.M., Kim, P.H., and Cho, J.Y. (2018). IFN- $\gamma$  enhances the wound healing effect of late EPCs (LEPCs) via BST2-mediated adhesion to endothelial cells. *FEBS Lett.* **592**, 1705–1715.
- Liberatore, R.A., and Bieniasz, P.D. (2011). Tetherin is a key effector of the antiretroviral activity of type I interferon in vitro and in vivo. *Proc. Natl. Acad. Sci. USA* **108**, 18097–18101.
- Liu, W., Cao, Y., Guan, Y., and Zheng, C. (2018). BST2 promotes cell proliferation, migration and induces NF- $\kappa$ B activation in gastric cancer. *Biotechnol. Lett.* **40**, 1015–1027.
- MacNamara, K.C., Jones, M., Martin, O., and Winslow, G.M. (2011). Transient activation of hematopoietic stem and progenitor cells by IFN $\gamma$  during acute bacterial infection. *PLoS One* **6**, e28669.
- Massberg, S., Schaerli, P., Knezevic-Maramica, I., Köllnberger, M., Tubo, N., Moseman, E.A., Huff, I.V., Junt, T., Wagers, A.J., Mazo, I.B., and von Andrian, U.H. (2007). Immunosurveillance by hematopoietic progenitor cells trafficking through blood, lymph, and peripheral tissues. *Cell* **131**, 994–1008.
- Matatall, K.A., Shen, C.-C., Challen, G.A., and King, K.Y. (2014). Type II interferon promotes differentiation of myeloid-biased hematopoietic stem cells. *Stem Cells* **32**, 3023–3030.
- Matatall, K.A., Jeong, M., Chen, S., Sun, D., Chen, F., Mo, Q., Kimmel, M., and King, K.Y. (2016). Chronic Infection Depletes Hematopoietic Stem Cells through Stress-Induced Terminal Differentiation. *Cell Rep.* **17**, 2584–2595.
- Mignone, J.L., Kukekov, V., Chiang, A.S., Steindler, D., and Enikolopov, G. (2004). Neural stem and progenitor cells in nestin-GFP transgenic mice. *J. Comp. Neurol.* **469**, 311–324.
- Morales-Mantilla, D.E., and King, K.Y. (2018). The Role of Interferon-Gamma in Hematopoietic Stem Cell Development, Homeostasis, and Disease. *Curr. Stem Cell Rep.* **4**, 264–271.
- Moreno-Mateos, M.A., Vejnar, C.E., Beaudoin, J., Fernandez, J.P., Mis, E.K., Khokha, M.K., Giraldez, A.J., et al. (2015). CRISPRscan: designing highly efficient sgRNAs for CRISPR-Cas9 targeting in vivo. *Nat. Methods* **12** (10), 982–988.
- Nie, Y., Han, Y.-C., and Zou, Y.-R. (2008). CXCR4 is required for the quiescence of primitive hematopoietic cells. *J. Exp. Med.* **205**, 777–783.
- Nisticò, A., and Young, N.S. (1994). gamma-Interferon gene expression in the bone marrow of patients with aplastic anemia. *Ann. Intern. Med.* **120**, 463–469.
- Ochiai, H. (2015). Single-Base Pair Genome Editing in Human Cells by Using Site-Specific Endonucleases. *Int. J. Mol. Sci.* **16** (9), 21128–21137.
- Park, H., Jang, H., Kim, C., Chung, B., Chang, C.L., Park, S.K., and Song, S. (2000). Detection and identification of mycobacteria by amplification of the internal transcribed spacer regions with genus- and species-specific PCR primers. *J. Clin. Microbiol.* **38**, 4080–4085.
- Park, D., Spencer, J.A., Koh, B.I., Kobayashi, T., Fujisaki, J., Clemens, T.L., Lin, C.P., Kronenberg, H.M., and Scadden, D.T. (2012). Endogenous bone marrow MSCs are dynamic, fate-restricted participants in bone maintenance and regeneration. *Cell Stem Cell* **10**, 259–272.
- Pietras, E.M. (2017). Inflammation: a key regulator of hematopoietic stem cell fate in health and disease. *Blood* **130**, 1693–1698.
- Pietras, E.M., Mirantes-Barbeito, C., Fong, S., Loeffler, D., Kovtonyuk, L.V., Zhang, S., Lakshminarasimhan, R., Chin, C.P., Techner, J.-M., Will, B., et al. (2016). Chronic interleukin-1 exposure drives haematopoietic stem cells towards precocious myeloid differentiation at the expense of self-renewal. *Nat. Cell Biol.* **18**, 607–618.
- Ramos-Casals, M., García-Carrasco, M., López-Medrano, F., Trejo, O., Forns, X., López-Guillermo, A., Muñoz, C., Ingelmo, M., and Font, J. (2003). Severe autoimmune cytopenias in treatment-naive hepatitis C virus infection: clinical description of 35 cases. *Medicine (Baltimore)* **82**, 87–96.
- Roesler, J., Horwitz, M.E., Picard, C., Bordigoni, P., Davies, G., Koscielniak, E., Levin, M., Veys, P., Reuter, U., Schulz, A., et al. (2004). Hematopoietic stem cell transplantation for complete IFN-gamma receptor 1 deficiency: a multi-institutional survey. *J. Pediatr.* **145**, 806–812.
- Runnels, J.M., Zamiri, P., Spencer, J.A., Veilleux, I., Wei, X., Bogdanov, A., and Lin, C.P. (2006). Imaging molecular expression on vascular endothelial cells by in vivo immunofluorescence microscopy. *Mol. Imaging* **5**, 31–40.
- Scadden, D.T., Zon, L.I., and Groopman, J.E. (1989). Pathophysiology and management of HIV-associated hematologic disorders. *Blood* **74**, 1455–1463.
- Schürch, C.M., Riether, C., and Ochsenbein, A.F. (2014). Cytotoxic CD8+ T cells stimulate hematopoietic progenitors by promoting cytokine release from bone marrow mesenchymal stromal cells. *Cell Stem Cell* **14**, 460–472.
- Sugiyama, T., Kohara, H., Noda, M., and Nagasawa, T. (2006). Maintenance of the hematopoietic stem cell pool by CXCL12-CXCR4 chemokine signaling in bone marrow stromal cell niches. *Immunity* **25**, 977–988.
- Takizawa, H., Fritsch, K., Kovtonyuk, L.V., Saito, Y., Yakkala, C., Jacobs, K., Ahuja, A.K., Lopes, M., Hausmann, A., Hardt, W.-D., et al. (2017). Pathogen-Induced TLR4-TRIF Innate Immune Signaling in Hematopoietic Stem Cells Promotes Proliferation but Reduces Competitive Fitness. *Cell Stem Cell* **21**, 225–240.e5.
- Toshiaki, Ara, Koji, Tokoyoda, Tatsuki, Sugiyama, Takeshi, Egawa, Kenji, Kawabata, and Takashi, Nagasawa (2003). Long-Term Hematopoietic Stem Cells Require Stromal Cell-Derived Factor-1 for Colonizing Bone Marrow during Ontogeny. *Immunity* **19**, 257–267.
- Tzeng, Y.S., Li, H., Kang, Y.L., Chen, W.C., Cheng, W.C., and Lai, D.M. (2011). Loss of Cxcl12/Sdf-1 in adult mice decreases the quiescent state of hematopoietic stem/progenitor cells and alters the pattern of hematopoietic regeneration after myelosuppression. *Blood* **117**, 429–439.
- Umamoto, T., Matsuzaki, Y., Shiratsuchi, Y., Hashimoto, M., Yoshimoto, T., Nakamura-Ishizu, A., Petrich, B., Yamato, M., and Suda, T. (2017). Integrin  $\alpha$ v $\beta$ 3 enhances the suppressive effect of interferon- $\gamma$  on hematopoietic stem cells. *EMBO J.* **36**, 2390–2403.
- van Buul, J.D., and Hordijk, P.L. (2004). Signaling in leukocyte transendothelial migration. *Arterioscler. Thromb. Vasc. Biol.* **24**, 824–833.
- Winkler, I.G., Barbier, V., Nowlan, B., Jacobsen, R.N., Forristal, C.E., Patton, J.T., Magnani, J.L., and Lévesque, J.-P. (2012). Vascular niche E-selectin regulates hematopoietic stem cell dormancy, self renewal and chemoresistance. *Nat. Med.* **18**, 1651–1657.
- Yamashita, M., and Passequé, E. (2019). TNF- $\alpha$  Coordinates Hematopoietic Stem Cell Survival and Myeloid Regeneration. *Cell Stem Cell* **25**, 357–372.e7.
- Yoo, H., Park, S.H., Ye, S.K., and Kim, M. (2011). IFN- $\gamma$ -induced BST2 mediates monocyte adhesion to human endothelial cells. *Cell. Immunol.* **267**, 23–29.
- Young, N.S., and Maciejewski, J. (1997). The pathophysiology of acquired aplastic anemia. *N. Engl. J. Med.* **336**, 1365–1372.
- Zhao, M., Tao, F., Venkatraman, A., Li, Z., Smith, S.E., Unruh, J., Chen, S., Ward, C., Qian, P., Perry, J.M., et al. (2019). N-Cadherin-Expressing Bone and Marrow Stromal Progenitor Cells Maintain Reserve Hematopoietic Stem Cells. *Cell Rep.* **26**, 652–669.e6.



STAR★METHODS

KEY RESOURCES TABLE

| REAGENT or RESOURCE                                           | SOURCE            | IDENTIFIER                        |
|---------------------------------------------------------------|-------------------|-----------------------------------|
| <b>Antibodies</b>                                             |                   |                                   |
| Anti-Mouse CD45.1 (PB conjugated, clone A20)                  | Biolegend         | Cat#110721; RRID: AB_492867       |
| Anti-Mouse CD45.1 (APC conjugated, clone A20)                 | eBioscience       | Cat#17-0453-81; RRID: AB_469397   |
| Anti-Mouse CD45.2 (BV 605 conjugated, clone 104)              | Biolegend         | Cat#109841; RRID: AB_2563485      |
| Anti-Mouse CD45.2 (PE conjugated, clone A20)                  | eBioscience       | Cat#12-0453-81; RRID: AB_465674   |
| Anti-Mouse c-kit/CD117 (APC-Cy7 conjugated, clone 2B8)        | eBioscience       | Cat#25-1171-82; RRID: AB_469644   |
| Anti-Mouse CD4 (PE-Cy5 conjugated, clone GK 1.5)              | eBioscience       | Cat#15-0041-82; RRID: AB_468695   |
| Anti-Mouse CD4 (FITC conjugated, clone GK1.5)                 | eBioscience       | Cat#11-0041-82; RRID: AB_464892   |
| Anti-Mouse CD8 (PE-Cy5 conjugated, clone 53-6.7)              | eBioscience       | Cat#15-0081-82; RRID: AB_468706   |
| Anti-Mouse CD8 (FITC conjugated, clone 53-6.7)                | eBioscience       | Cat#11-0081-82; RRID: AB_464915   |
| Anti-Mouse CD45R/B220 (PE-Cy5 conjugated, clone RA3-6B2)      | eBioscience       | Cat#15-0452-82; RRID: AB_468755   |
| Anti-Mouse CD45R/B220 (PE-Cy7 conjugated, clone RA3-6B2)      | eBioscience       | Cat#25-0452-82; RRID: AB_469627   |
| Anti-Mouse/Human CD45R/B220 (FITC conjugated, clone RA3-6B2)  | eBioscience       | Cat#11-0452-82; RRID: AB_465054   |
| Anti-Mouse Ly-6G/Gr1 (PE-Cy5 conjugated, clone RB6-8C5)       | eBioscience       | Cat#15-5931-82; RRID: AB_468813   |
| Anti-Mouse Ly-6G/Gr1 (PE-Cy7 conjugated, clone RB6-8C5)       | eBioscience       | Cat#25-5931-82; RRID: AB_469663   |
| Anti-Mouse CD11b/Mac1 (PE-Cy5 conjugated, clone M1/70)        | eBioscience       | Cat#15-0112-82; RRID: AB_468714   |
| Anti-Mouse CD11b/Mac1 (PE-Cy7 conjugated, M1/70)              | eBioscience       | Cat#25-0112-81; RRID: AB_469587   |
| Anti-Mouse Ter119 (PE-Cy5 conjugated, clone M1/70)            | eBioscience       | Cat#15-5921-82; RRID: AB_468810   |
| Anti-Mouse CD150/SLAM (PE-Cy7 conjugated, clone TC15-12F12.2) | Biolegend         | Cat#115914; RRID: AB_439797       |
| Anti-Mouse CD48 (APC conjugated, clone HM48-1)                | eBioscience       | Cat#17-0481-82; RRID: AB_469408   |
| Anti-Mouse CD34 (FITC conjugated, clone RAM34)                | eBioscience       | Cat#11-0341-82; RRID: AB_465021   |
| Anti-Mouse Flk2/Flt3/CD135 (PE conjugated, clone A2F10)       | eBioscience       | Cat#12-1351-82; RRID: AB_465859   |
| Anti-Mouse Annexin V (PE conjugated)                          | BD PharMingen     | Cat#556422; RRID: AB_2108590      |
| Anti-Human CD34 (PB conjugated, clone RAM34)                  | eBioscience       | Cat# 48-0341-82; RRID: AB_2043837 |
| DAPI                                                          | Life technologies | Cat#D1306; RRID: AB_2629482       |
| Anti-E-selectin Rat monoclonal antibody(clone 9A9)            | Bio X cell        | Cat# BE0294; RRID: AB_2687816     |

(Continued on next page)

| REAGENT or RESOURCE                                                                                           | SOURCE                           | IDENTIFIER                                                                          |
|---------------------------------------------------------------------------------------------------------------|----------------------------------|-------------------------------------------------------------------------------------|
| Purified Rat IgG1 lambda isotype control (clone A110-1)                                                       | BD                               | Cat#553993; RRID: AB_395190                                                         |
| Anti-Mouse CD184 (BV605 conjugated, clone 2B11)                                                               | BD                               | Cat#740378; RRID: AB_2740109                                                        |
| Anti-Mouse IgG2b,k (BV605 conjugated, clone R35-38)                                                           | BD                               | Cat#563145; RRID: N/A                                                               |
| Anti-Human CD317 (PE conjugated, clone 26F8)                                                                  | eBioscience                      | Cat#12-3179-42; RRID: AB_10596640                                                   |
| Anti-Mouse CD317(Biotin conjugated, clone eBio927)                                                            | eBioscience                      | Cat#13-3172-82; RRID: AB_763415                                                     |
| <b>Bacterial and Virus Strains</b>                                                                            |                                  |                                                                                     |
| <i>Mycobacterium avium</i>                                                                                    | N/A                              | strain SmT 2151                                                                     |
| <b>Biological Samples</b>                                                                                     |                                  |                                                                                     |
| Human Buffy coat samples                                                                                      | Gulf Coast Regional Blood Center | <a href="https://www.gulfcoastconsortia.org">https://www.gulfcoastconsortia.org</a> |
| <b>Chemicals, Peptides, and Recombinant Proteins</b>                                                          |                                  |                                                                                     |
| Recombinant Mouse IFN $\gamma$                                                                                | eBioscience                      | Cat#BMS326                                                                          |
| Recombinant Human IFN $\gamma$                                                                                | RD Biosystems                    | Cat#285-IF-100                                                                      |
| Recombinant Human Flt3-Ligand                                                                                 | Preprotech                       | Cat#300-19                                                                          |
| Recombinant Human IL-3                                                                                        | Preprotech                       | Cat#200-03                                                                          |
| Recombinant Human SCF                                                                                         | Preprotech                       | Cat#300-07                                                                          |
| Recombinant Human TPO                                                                                         | Preprotech                       | Cat#300-18                                                                          |
| Recombinant Mouse TGF $\beta$                                                                                 | R&D Biosystems                   | Cat#7346-B2/CF                                                                      |
| Mouse E-selectin                                                                                              | R&D Biosystems                   | Cat#575-ES100                                                                       |
| Mouse P-selectin                                                                                              | R&D Biosystems                   | Cat#737-PS-050                                                                      |
| Human E-selectin                                                                                              | R&D Biosystems                   | Cat#724-ES-100                                                                      |
| Mouse CD117 Micro Beads                                                                                       | MACS Miltenyi Biotec             | Cat#130-091-224                                                                     |
| Human CD34 Micro Beads                                                                                        | MACS Miltenyi Biotec             | Cat#130-046-702                                                                     |
| CFSE                                                                                                          | Life Technologies                | C34554                                                                              |
| DDAO                                                                                                          | Life Technologies                | C34553                                                                              |
| Recombinant human TNF $\alpha$ protein                                                                        | Fisher                           | PHC3016                                                                             |
| Tamoxifen                                                                                                     | SantaCruz Biotechnology          | CAS 10540-29-1                                                                      |
| <b>Critical Commercial Assays</b>                                                                             |                                  |                                                                                     |
| NucleoSpin RNA Plus XS kit                                                                                    | Macherey-Nagel                   | Cat# 740990                                                                         |
| SMARTer <sup>®</sup> Stranded Total RNA-Seq Kit v2 - Pico Input Mammalian                                     | Takara                           | Cat# 634411                                                                         |
| RNAqueous Kit                                                                                                 | Ambion                           | Cat#AM1912                                                                          |
| SuperScript III First-Strand Synthesis Supermix                                                               | Invitrogen                       | Cat#18080051                                                                        |
| iTaq Universal SYBR Green Supermix                                                                            | BioRad                           | Cat#172-5121                                                                        |
| BrdU Flow Kit (FITC conjugated)                                                                               | BD                               | Cat# 559619                                                                         |
| <b>Deposited Data</b>                                                                                         |                                  |                                                                                     |
| <a href="https://data.mendeley.com/datasets/mhc8b4yn9d/1">https://data.mendeley.com/datasets/mhc8b4yn9d/1</a> | N/A                              | N/A                                                                                 |
| <b>Experimental Models: Organisms/Strains</b>                                                                 |                                  |                                                                                     |
| CD45.1 mice                                                                                                   | Baylor College of Medicine       | JAX Stock#0066584                                                                   |
| CD45.2 mice                                                                                                   | Baylor College of Medicine       | Stock#14170                                                                         |
| Bst2 <sup>-/-</sup> mice                                                                                      | Jackson Labs                     | Stock#029892                                                                        |
| Ifngr1 <sup>-/-</sup> mice                                                                                    | Jackson Labs                     | Stock#025545                                                                        |
| CXCL12 <sup>GFP/+</sup>                                                                                       | (Toshiaki et al., 2003)          | N/A                                                                                 |

(Continued on next page)

**Continued**

| REAGENT or RESOURCE                                                   | SOURCE                                         | IDENTIFIER |
|-----------------------------------------------------------------------|------------------------------------------------|------------|
| Krt18-CreER (Tg(KRT18-cre/ERT)23Blpn/J                                | Dr. Nakada Daisuke, Baylor College of Medicine | N/A        |
| B6.Cg-Gt(ROSA)26Sor <sup>tm14(CAG-tdTomato)Hze/J</sup>                | Jackson Labs                                   | JAX:007914 |
| Oligonucleotides                                                      |                                                |            |
| sgRNA: BST2+17403843 - UGC<br>GGUACAGAUGGCAAAC                        | Synthego                                       | N/A        |
| sgRNA: BST2-17403817 - GUA<br>CCGCAGAAGAGAAAACC                       | Synthego                                       | N/A        |
| sgRNA: BST2+17403810 - CGA<br>UUCUCACGCUUAAGACC                       | Synthego                                       | N/A        |
| sgRNA: BST2+17403763 - CGC<br>AGCGGAGCUGGAGUCCU                       | Synthego                                       | N/A        |
| Forward Primer 1: GATCAAG<br>GGAATGTTCAAGCGAAA                        | Integrated DNA Technologies                    | N/A        |
| Reverse Primer 1: AGGATCT<br>CCTTTGCTCCCAAATC                         | Integrated DNA Technologies                    | N/A        |
| Forward Primer 2: CATCCTT<br>CTCACTGGATTCTCCC                         | Integrated DNA Technologies                    | N/A        |
| Reverse Primer 2: ATAAAC<br>CATAAGCTTCAGGACGC                         | Integrated DNA Technologies                    | N/A        |
| Forward sequencing<br>primer 1: CTGCAGCCTCT<br>CTCTCTAGACTT           | Integrated DNA Technologies                    | N/A        |
| Forward sequencing<br>primer 2: CTGCAGCCTCT<br>CTCTCTAGACTTC          | Integrated DNA Technologies                    | N/A        |
| Software and Algorithms                                               |                                                |            |
| Prism                                                                 | N/A                                            | N/A        |
| Flow Jo                                                               | N/A                                            | N/A        |
| Fiji                                                                  | N/A                                            | N/A        |
| Leica Application Suite software (Version<br>3.3), Leica Microsystems | N/A                                            | N/A        |
| Other                                                                 |                                                |            |
| StemSpan SFEM                                                         | StemCell Technologies, Inc.                    | Cat#9600   |

**RESOURCE AVAILABILITY**

**Lead contact**

Further information and requests for resources and reagents should be directed to and will be fulfilled by the Lead Contact, Katherine Y. King ([kyk@bcm.edu](mailto:kyk@bcm.edu)).

**Materials availability**

This study did not generate new unique reagents.

**Data and code availability**

The microarray data generated during this study are available at <https://data.mendeley.com/datasets/mhc8b4yn9d/1>

**EXPERIMENTAL MODEL AND SUBJECT DETAILS**

**Animals**

Wild-type C57BL/6 (CD45.2) and C57BL/6.SJL (CD45.1) mice 6-18 weeks of age were used, with equal numbers of males and females. C57BL/6 *Ifngr1*<sup>-/-</sup> (Stock #3288) and *Bst2*<sup>-/-</sup> mice (Stock #029892) ([Liberatore and Bieniasz, 2011](#)) were obtained from

Jackson Laboratories (Bar Harbor, ME [14]). CXCL12-GFP (Mignone et al., 2004) (C57/BL6 background) mice were kindly provided by Dr. Takashi Nagasawa. Krt18-CreERT Rosa26-tdTomato+ reporter mice were generously provided by Dr. Daisuke Nakada (Chapple et al., 2018) and crossed with CXCL12-GFP transgenic mice to create trigenic Krt18-CreER<sup>+</sup>Rosa26-Tomato<sup>+</sup>CXCL12-GFP<sup>+</sup> (Krt18/Tomato/CXCL12-GFP) mice. All mice were maintained at an AALAC-accredited, specific-pathogen-free animal facility at Baylor College of Medicine under the approved protocol AN-4802. Genotypes were confirmed by PCR. Experiments were always done at the same time of the day, beginning at 7 am, with the control and test samples compared at the same time of the day.

### Microbial infections

Mice were infected with  $2 \times 10^6$  colony-forming units of *Mycobacterium avium* IV as described (Feng et al., 2008). *M. avium* was detected by growth on Middlebrook agar and by PCR (Park et al., 2000). For chronic infections, mice were infected every month for four months.

### Cell lines

HL-60 and OCI AML3 cell lines were provided by the Goodell laboratory. Both cell lines were cultured in RPMI 10% FBS supplemented with 2mM L-glutamate and penicillin/streptomycin.

### Primary cell cultures

Human CD34<sup>+</sup> cells were isolated from Buffy coat samples or frozen umbilical cord blood samples by enrichment using anti-CD34 magnetic microbeads (Macs, Miltenyi). CD34<sup>+</sup> cord blood cells were expanded in StemSpan SFEM (Stem Cell Technologies) supplemented with 100ng/ml rhFLT-3L, 100ng/ml rhSCF, 100ng/ml rhTPO and 20ng/ml IL-3 (Preprotech). rhIFN $\gamma$  (1000 U/mL) was added to media for 18hrs before harvest.

## METHOD DETAILS

### Limiting dilution transplants

Limiting dilution experiments were carried out by transplanting  $1 \times 10^4$ ,  $8 \times 10^4$ , or  $2 \times 10^5$  CD45.2 WBM cells from WT or *Ifngr1*<sup>-/-</sup> mice along with  $2 \times 10^5$  CD45.1 rescue marrow into lethally irradiated recipient mice. Ten mice were transplanted per group. The CD45.2 WBM engraftment was determined 28 weeks post-transplant. Stem cell frequency was determined using Extreme Limiting Dilution Analysis (Hu and Smyth, 2009). Any transplanted mouse with total engraftment below 1% or less than 1% contribution to any lineage was considered a non-responder.

### Bst2<sup>-/-</sup> Transplants

Bst2<sup>-/-</sup> WBM transplants were carried out by transplanting  $2 \times 10^5$  WBM cells from wild-type or Bst2<sup>-/-</sup> CD45.2 mice along with  $2 \times 10^5$  CD45.1 rescue marrow into lethally irradiated recipient mice. Bst2<sup>-/-</sup> HSC transplants were carried out by transplanting 300 sorted HSCs (LSK CD150<sup>+</sup> CD48<sup>-</sup> CD34<sup>-</sup>) from wild-type or Bst2<sup>-/-</sup> CD45.2 mice along with  $2 \times 10^5$  CD45.1 rescue marrow into lethally irradiated recipient mice. CD45.2 peripheral blood engraftment was assessed at 4, 8, 12, 16, and 20 weeks post-transplant. CD45.2 WBM engraftment was determined at 20 weeks post-transplant.

### Homing assays

For homing studies, cKit<sup>+</sup> cells were isolated from control or test animals by magnetic bead enrichment using CD117 beads (Automacs, Miltenyi Biotech). Control cells were stained with 2mM DDAO (Molecular Probes) and test cells were stained with 2 mM CFSE (Molecular Probes). Cells were admixed and  $\sim 1 \times 10^5$  cells of each kind were injected intravenously into lethally irradiated animals. 17 h later, the bones were harvested and the ratio of CFSE:DDAO positive cells in bone marrow was measured by flow cytometry.

### Intrafemoral transplants

Whole bone marrow cells ( $2 \times 10^5$ ) from 12 week old WT or *Ifngr1*<sup>-/-</sup> mice were admixed with an equal number of WBM cells from WT C57BL/6.SJL (CD45.1) mice and injected in a total volume of 50  $\mu$ L directly into the femur of each recipient animal. Five animals were used per cohort and engraftment was assessed monthly for twelve weeks.

### Intravital imaging of cell-niche interactions

For live *in vivo* imaging of HSC and niche interaction, CXCL12-GFP knockin mice were lethally irradiated with 9.5 Gy the day of HSC transplantation. Sorted HSCs or B cells from indicated mice were stained with 1  $\mu$ M of CMTMR for 30 min and transplanted intravenously into CXCL12-GFP knockin mice. 24 h later, mice were treated with 100  $\mu$ g rIFN $\gamma$ , 100 ng TGF $\beta$ , TNF $\alpha$  or 300  $\mu$ g IFN $\alpha$  and prepared for visualization under a customized two-photon and confocal hybrid microscope (Leica TCS SP8MP with DM6000CFS) specifically designed for live animal imaging, as described in previous report (Park et al., 2012). The mice were then mounted on a 3-D axis motorized stage (Anaheim Automation Anaheim, CA), and the calvarial bone was scanned for second harmonic generation (SHG from bone collagens by femto-second titanium:sapphire laser pulses: 880 nm) to identify bone and bone marrow structures and the intersection of the sagittal and coronal sutures. CXCL12-GFP-expressing cells (488 nm excitation,



505–545 nm detection) and CMTMR+ HSCs (541 nm excitation, 590–620 nm detection) were simultaneously imaged using confocal spectral fluorescence. All images were recorded with their distances to the intersection of the sagittal and coronal sutures to define their precise location. Each image was recorded by Z stacks with 50–100  $\mu\text{m}$  depth from the bone surface at a 2- $\mu\text{m}$  interval. A PCI-based image capture board (Snapper, Active Silicon) was used to acquire up to three channels simultaneously using the Leica Application Suite software (Version 3.3). 3-D Images and the distance between HSCs and niche cells were measured using the Leica Application Suite software.

### RNA purification and realtime PCR

RNA was isolated from HSCs (Lin- cKit+ Sca1+ CD150+ CD48- CD34-) from control, 24hr IFN $\gamma$ -treated, or 4-week *M. avium*-infected wild-type and *Ifngr1*<sup>-/-</sup> mice using RNeasy Micro Plus (QIAGEN). Real-time PCR was performed using iTaq Universal SYBR Green SupermixBR Green Master Mix (BioRad). All data were normalized to an 18 s endogenous control.

### PRIMER SEQUENCES

| Gene | Primer  | Sequence                |
|------|---------|-------------------------|
| Bst2 | Forward | TCAGGAGTCCCTGGAGAAGAA   |
| Bst2 | Reverse | AGAAGTCTCCTTTGGATCCTCAG |

### Flow cytometry

Whole bone marrow cells were isolated from femurs and tibias. Following RBC lysis, cells were co-stained for BST2 and HSCs markers. Unless otherwise stated, HSCs were defined as Lineage- cKit+ Sca1+, CD150+, CD48-, CD34-. Cells were suspended at a concentration of 10<sup>8</sup> cells/mL and incubated in 4°C for 15 min with the desired antibodies. See [Key Resources Table](#) for a list of antibodies used.

### CXCR4 expression analysis

Wild-type and *Ifngr1*<sup>-/-</sup> mice were treated with either PBS (control) or IFN $\gamma$  24 h prior to bone marrow harvest. WBM was RBC lysed and cKit+ cells were isolated from control or test animals by magnetic bead enrichment using CD117 beads. CXCR4 protein expression was determined by flow cytometry.

### Selectin binding assays

For the plate binding assays 96-well plates were coated with E-selectin or P-selectin (R&D Systems) at 3 $\mu\text{g}/\text{mL}$  for 16hrs at 4°C. Unbound selectin was removed and plates were blocked for 1hr at room temperature with 1% BSA. Plates were then washed 4 times with PBS + 1% BSA and used immediately. WBM was harvested from wild-type or BST2 KO mice 18hrs post IFN $\gamma$  treatment. WBM was then RBC lysed and enriched for cKit+ cells using CD117 MicroBeads (Miltenyi-Biotec) and an AutoMACS Pro Separator. cKit-enriched cells were then stained at 1x10<sup>6</sup> cells/mL with 5 $\mu\text{M}$  CFSE for 20mins at 37°C. Stained cells were then washed and resuspended at 2x10<sup>5</sup> cells/mL in media containing 1mM CaCl<sub>2</sub> or 5mM EDTA. 100 $\mu\text{l}$  of this cell suspension was plated per well on the selectin coated 96-well plates. Cells were sedimented at 1000rpm for 5 mins followed by incubation at 4°C for 30mins. Plates were then washed 4 times before lysing the cells with 1% SDS. Fluorescent intensity was measured at an excitation of 492 and emission of 517 using a BioTek Cytation5 Imaging Reader. Similarly, E-selectin assays were also performed by staining cKit-enriched 1x10<sup>6</sup> cells/mL cells with 2  $\mu\text{M}$  DDAO, resuspending at 2x10<sup>5</sup> cells/mL in media containing 1mM CaCl<sub>2</sub> or 5mM EDTA and plating 100  $\mu\text{l}$  on 96 well plates. Cells were sedimented at 1000rpm for 5 mins followed by incubation at 4°C for 30mins. Plates were then washed 4 times and wells were imaged using Echo Revolve florescent microscope. Cells were counted using Fiji software.

For the flow cytometry binding assay cKit+ progenitor cells were enriched from WBM using CD117 MicroBeads (Miltenyi-Biotec) and an AutoMACS Pro Separator. cKit+ cells were then stained for HSPC markers (Lineage, cKit, CD150 and CD48). Recombinant E-selectin (E-Selectin/CD62E Fc Chimera Protein) was pre-incubated with human IgG-FITC for 1hr at 4°C. 2x10<sup>5</sup> stained cKit+ cells were then incubated with 3 $\mu\text{g}$  of FITC-tagged E-selectin for 20mins at 4°C in PBS + 0.2% BSA + 1mM CaCl<sub>2</sub>. Cells were then washed and analyzed by flow cytometry.

### Transwell migration assay

WBM was isolated from mice 18hrs post IFN $\gamma$ -treatment. WBM was then RBC lysed and enriched for cKit+ cells using CD117 MicroBeads (Miltenyi-Biotec) and an AutoMACS Pro Separator. cKit+ cells were then plated in the top chamber of a transwell plate (5 $\mu\text{m}$  pore, 24 well) at 1x10<sup>6</sup> cells/well. Recombinant mCXCL12 (Peprotech) at 20ng/mL was added to the bottom chamber of the well and cells were allowed to migrate for 2hrs at 37°C. Cells were then harvested from both the top and bottom chambers. % cells migrated was calculated as the number of the cells in the lower chamber compared to the total cells. Flow cytometry was performed to confirm that the % HSCs in the upper and lower chambers were the same.

### CRISPR deletion

BST2 was edited in the human cell line HL60 and in CD34+ HSPCs isolated from adult peripheral blood. Four separate single guide RNAs (sgRNAs) were designed using CRISPRSCAN software (Moreno-Mateos et al., 2015) and cloned by PCR into pKLV-U6gRNA-EF(BbsI)-PGKpuro2ABFP (Ochiai, 2015). The 4 forward primers used were of sequence: TTAATACGACTCACTATAGG + 18N +GTTTAAGAGCTATGCTGGAAACAGC and the common reverse primer was AGCACCGACTCGGTGCCACT. Guide sequences are listed in the [Key Resources Table](#). Single guide RNAs were used at concentration 1  $\mu\text{g}/\mu\text{l}$ , mixed with 1  $\mu\text{g}$  Cas9 protein (PNA Bio) and transduced into CD34+ cells by electroporation.

### Gene expression profiling

Expression profiling of HSCs from control or 24hr IFN $\gamma$ -treated mice was performed using Agilent's SurePrint G3 Mouse Exon 4x180K Microarray. The Bioconductor package limma was used to analyze the microarray data. The data were background corrected by 'normexp' method with an offset of 16 added to the intensities before log<sub>2</sub>-transforming and then quantile normalized. Probes without gene description were filtered out before hypothesis testing. Moderated t-statistics were used to test if genes were differentially expressed between the groups of interest and Benjamini-Hochberg method was used to estimate false discovery rate (FDR). Probes with p value < 0.1 and fold change > 1.5 was considered top differentially expressed genes.

### BrdU incorporation

Mice were injected with 1mg BrdU (10 mg/mL in PBS) per 6g body weight by IP 24 h before euthanasia. Bone marrow was stained using the BrdU flow kit (BD) and anti-BrdU FITC antibody. The BrdU staining of whole bone marrow was used as the "positive" control.

### Hoechst Pyronin Y

Mice were infected with  $2 \times 10^6$  colony-forming units *M. avium* for one month prior to WBM harvest. WBM was then RBC lysed and washed with PBS. Cells were pelleted and fixed with 70% ethanol added dropwise with gentle mixing. Cells were incubated on ice for > 2 h. Afterward, cells were washed twice with media followed by staining with 5  $\mu\text{M}$  Hoechst and 10  $\mu\text{M}$  pyronin Y for 1 h on ice. Cells were washed and subsequently stained for LT-HSCs (Lineage, cKit, CD150, CD48, CD34) and analyzed by flow cytometry.

### QUANTIFICATION AND STATISTICAL ANALYSIS

Mean values  $\pm$  SEM are shown. Identification of outliers (ROUT method, Q = 5%), normality and lognormality tests were performed to determine the proper use of parametric and nonparametric tests for analysis. Generally, Student's t test, one-way ANOVA or two-way ANOVA were used for comparisons (GraphPad Prism Version 5.0).

**Cell Reports, Volume 33**

**Supplemental Information**

**Interferon Gamma Mediates  
Hematopoietic Stem Cell Activation  
and Niche Relocalization through BST2**

**Marcus A. Florez, Katie A. Matatall, Youngjae Jeong, Laura Ortinau, Paul W. Shafer, Anne M. Lynch, Roman Jaksik, Marek Kimmel, Dongsu Park, and Katherine Y. King**

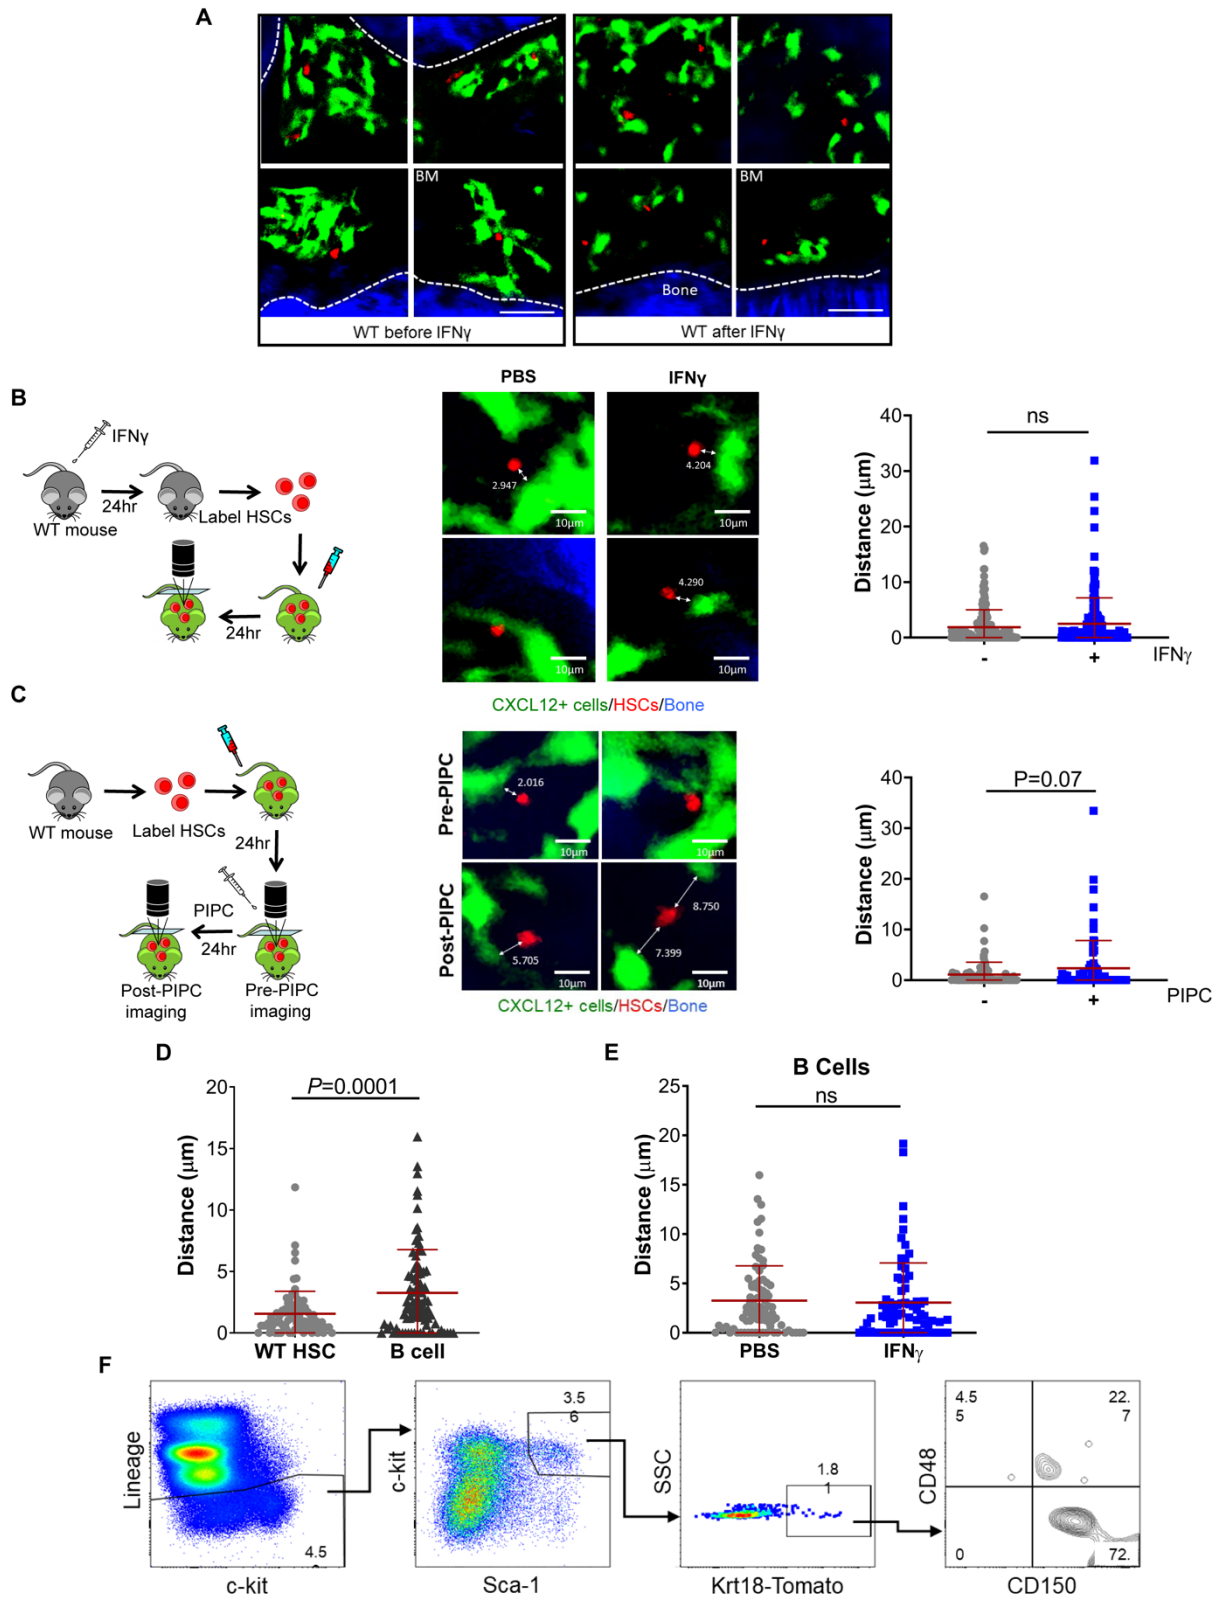

Supplemental Figure 1. IFN-mediated relocalization of HSCs in the BM is transient



**and specific, related to Figure 1:** (A) Representative images of murine bone marrow from WT HSCs within CXCL12-reporter mice before or 24 hours after IFN $\gamma$  treatment. (B) Donor mice were treated with IFN $\gamma$  24 hours before isolation of HSCs. Data include total n= 159-193; data are representative of 2 independent experiments. Mean distances: WT control 1.88  $\mu$ m, n=193; WT IFN $\gamma$  2.52  $\mu$ m, n=159. (C) Representative imaging of WT HSCs before or 24 hours after PIPC. n=73-82. ns: not significant by Mann Whitney test. Mean distances: WT control 1.10  $\mu$ m, n=82; WT IFN $\alpha$  2.33  $\mu$ m, n=73. (D) WT B cells or HSCs baseline distance from CAR cells. Data include total n=83-84 cells per group and were analyzed by Mann Whitney test. Mean distances: WT HSC 1.55  $\mu$ m n=83; B cell 3.26  $\mu$ m n=84. (E) WT B cells before or 24 hours after systemic treatment with IFN $\gamma$ . Data include total n=74-84 cells per group and were analyzed by Mann Whitney test. Mean distances: WT PBS 3.26  $\mu$ m, n=84; WT IFN $\gamma$  3.05  $\mu$ m, n=74. ns not significant. (F) Bone marrow cells from Krt18-CreER-Tomato mice 1 day after a single dose of tamoxifen treatment (50mg/kg) analyzed by FACS. Error bars represent mean  $\pm$  SD; scale bars represent 10  $\mu$ m.

**A**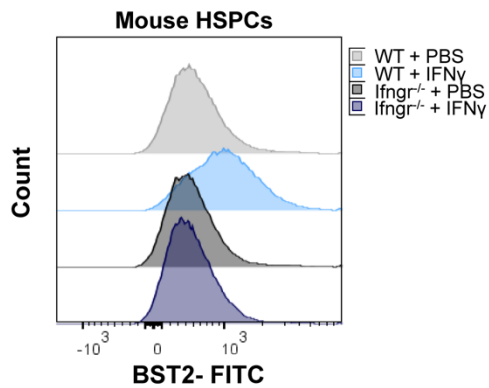**B**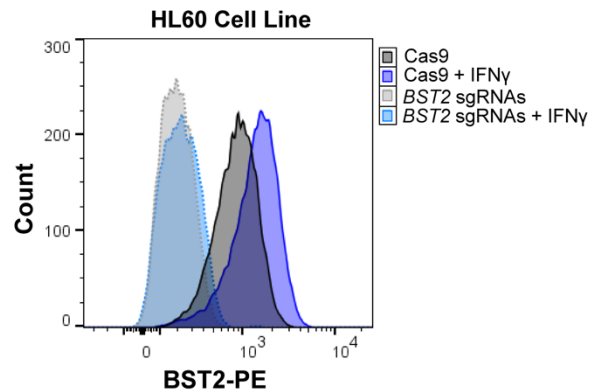

**Supplemental Figure 2. BST2 is induced by IFN $\gamma$  in murine HSPCs and human HL60 cells, related to Figure 2:**

(A) BST2 protein expression in HSPCs (cKIT<sup>+</sup> cells) isolated from naïve or *M. avium* infected WT or *Ifngr1*<sup>-/-</sup> mice. Shown as MFI of BST2-FITC in WT control (black), WT treated with IFN $\gamma$  (light blue), *Ifngr1*<sup>-/-</sup> control (light grey), or *Ifngr1*<sup>-/-</sup> treated with IFN $\gamma$  (dark blue) cells. (B) Representative protein expression of BST2 in HL60s following IFN $\gamma$  treatment, assessed by flow cytometry. Cells in which BST2 was deleted by CRISPR editing are utilized as a negative control. Shown as MFI of BST2-PE in HL60 cells (black), HL60 cells treated with IFN $\gamma$  (dark blue), BST2-edited HL60 cells (light grey), or BST2-edited HL60 cells treated with IFN $\gamma$  (light blue) cells.

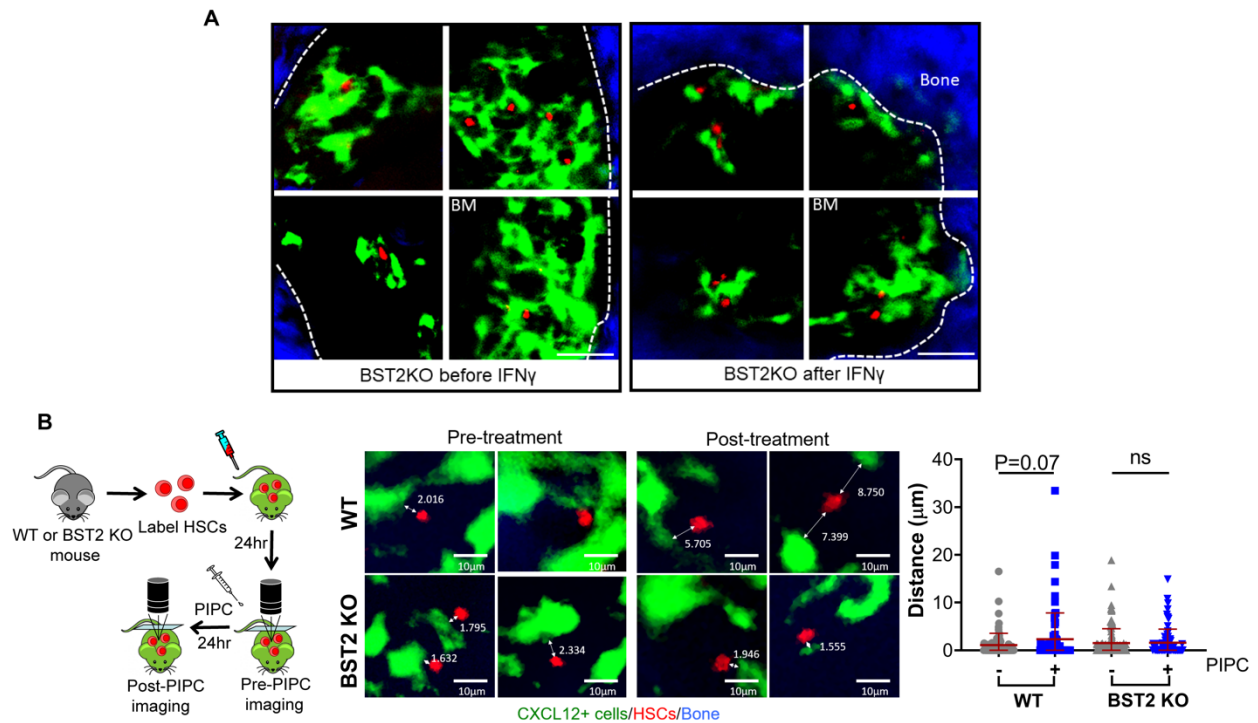

**Supplemental Figure 3. BST2 is required for IFN-dependent relocalization of HSCs in the BM niche, related to Figure 3:**

(A) Representative images of murine bone marrow from *Bst2*<sup>-/-</sup> HSCs within CXCL12-reporter mice before or 24 hours after IFN $\gamma$  treatment. (B) Representative imaging of WT versus *Bst2*<sup>-/-</sup> HSCs before or 24 hours after PIPIC. Data include a total of n=73-115. ns not significant by Mann Whitney test. Mean distances: WT control 1.10  $\mu$ m, n=82; WT PIPIC 2.33  $\mu$ m, n=73; BST2 KO control 1.07  $\mu$ m, n=115; BST2 KO PIPIC 1.61  $\mu$ m, n=80. Data presented as mean  $\pm$  SD; scale bars represent 10  $\mu$ m.

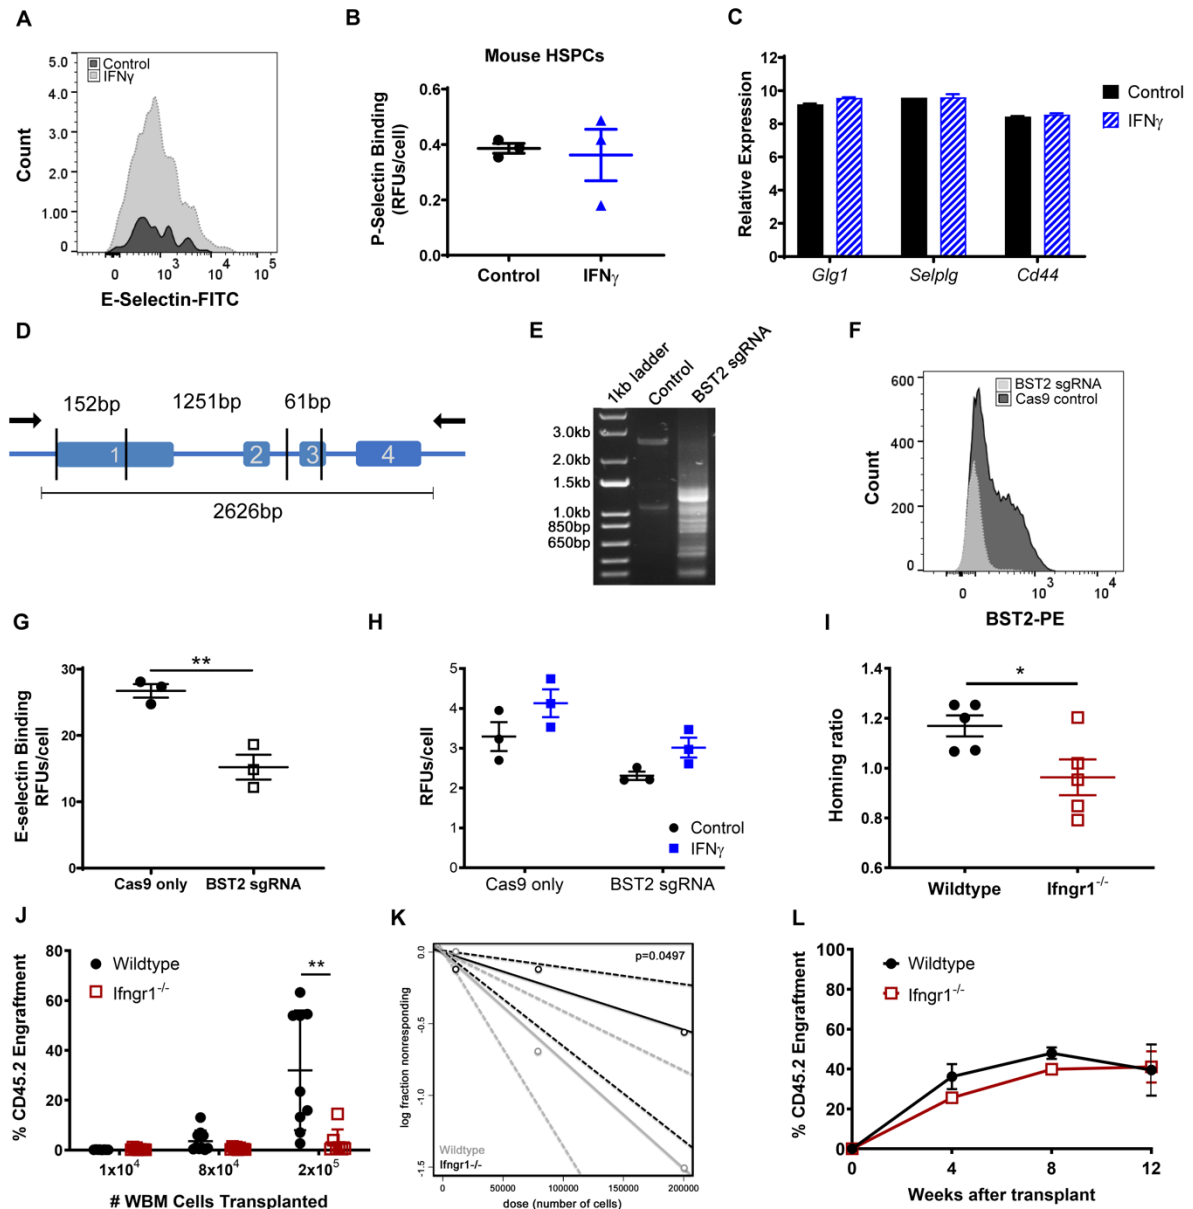

**Supplemental Figure 4. BST2 promotes E-selectin binding and HSC homing, related to Figure 4:**

(A) Flow cytometric E-selectin adhesion assay of control or 18hr IFN $\gamma$ -treated mouse cKit<sup>+</sup> progenitors. Data shown as representative histograms of E-selectin-FITC expression for control (black) or IFN $\gamma$ -treated (light grey) HSPCs (Lineage- cKit<sup>+</sup> CD150<sup>+</sup> CD48<sup>-</sup>). MFI control 789, MFI IFN $\gamma$ -treated 867. (B) *In vitro* P-selectin

adhesion plate assay of cKit<sup>+</sup> progenitors isolated from control or IFN $\gamma$ -treated mice. Data shown are normalized to background and reported in relative light units. (C) RNA expression level of canonical E-selectin ligands, Glg1, Selp1g and Cd44 in HSCs isolated from control or IFN $\gamma$ -treated mice. (D) Schematic representation of the *BST2* genomic locus. Exons are indicated by the numbered boxes, with vertical lines representing the cut sites of sgRNA1-4 used for CRISPR gene editing. Black arrows demark the location of the primers used for DNA confirmation of editing. (E) Representative gel of exons1-4 of human *BST2* PCR amplified from human peripheral blood-derived CD34<sup>+</sup> HSPCs following electroporation with Cas9 only or Cas9 + 4 sgRNAs against *BST2*. (F) Representative protein expression of *BST2* in CD34<sup>+</sup> HSPCs following gene editing, assessed by flow cytometry. Shown as mean fluorescent intensity (MFI) of *BST2*-PE in Cas9 control (black) or *BST2* edited (light grey) CD34<sup>+</sup> cells. (G) *In vitro* E-selectin plate adhesion assay of control or *BST2*-edited human CD34<sup>+</sup> HSPCs. Data shown are normalized to background and reported in relative light units/cell. n=3; representative of 2 independent experiments. (H) *In vitro* E-selectin plate adhesion assay of control or *BST2*-edited human CD34<sup>+</sup> HSPCs upon IFN $\gamma$  treatment. Data shown are normalized to background and reported in relative light units/cell. n=3; representative of 2 independent experiments. (I) Homing assay in which test marrow (CFSE stained) was mixed with normal marrow (DDAO stained) before injection into recipient mice. Test marrow was from WT or *Ifngr1*<sup>-/-</sup> cKit<sup>+</sup> cells. n=5 per group; representative of 2 independent experiments. (J-K) Limiting dilution experiments from wildtype or *Ifngr1*<sup>-/-</sup> mice. The CD45.2 WBM engraftment was determined 28 weeks post-transplant. n=7-10 per group. (J) % CD45.2 cells of total live WBM. (K)



Extreme limiting dilution analysis (ELDA) of WBM engraftment at 28 weeks post-transplant. A cutoff of at least 1% engraftment of all three lineages (myeloid, T cells and B cells) was used to determine the number of mice that engrafted. (L) Intrafemoral transplants of wildtype or *Ifngr1*<sup>-/-</sup> CD45.2 WBM. Data are shown as % CD45.2 engraftment at 4, 8, and 12 weeks post-transplant. Data are representative of two independent experiments and presented as mean  $\pm$  SEM; \* p<0.05, \*\* p<0.01, \*\*\* p<0.0001.

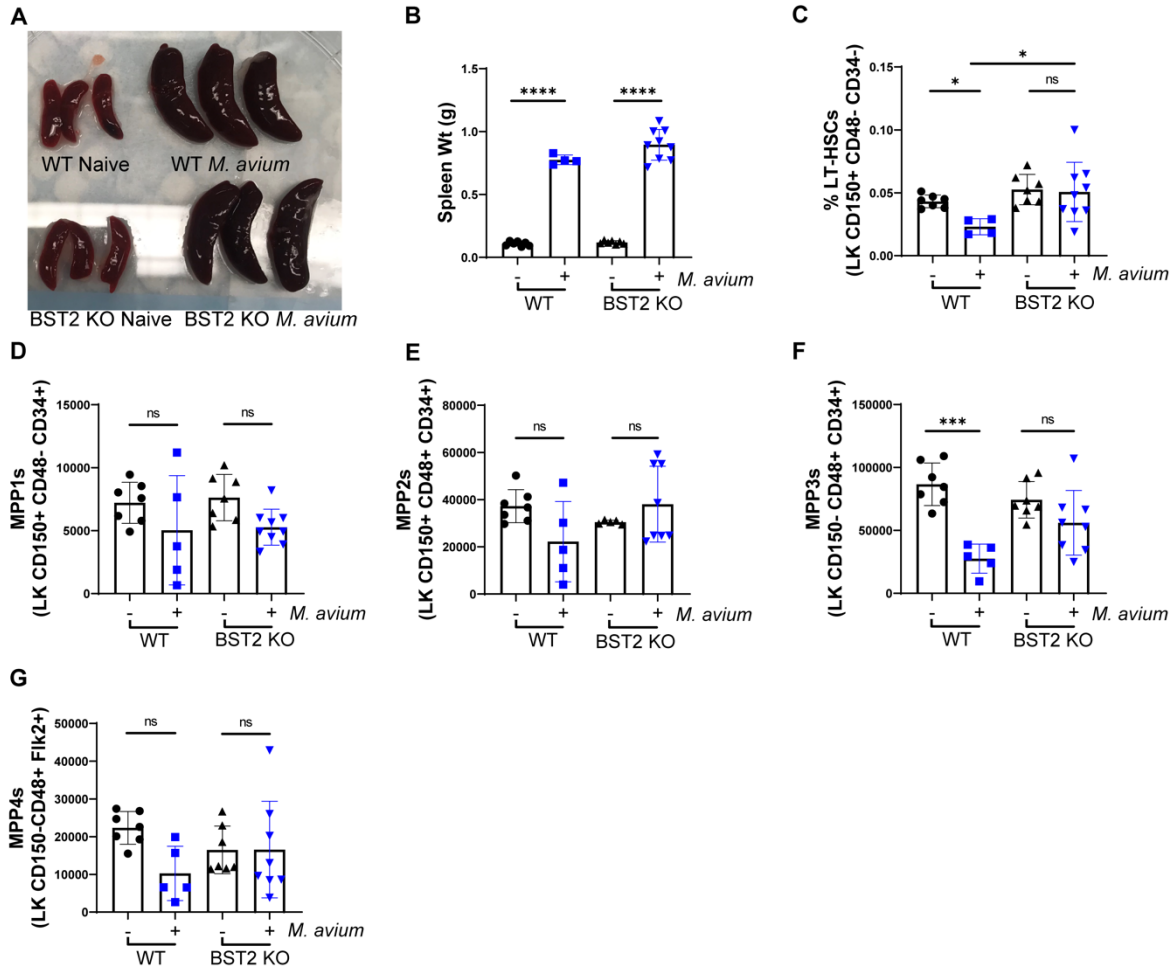

**Supplemental Figure 5. Upon chronic *M. avium* infection HSCs from BST2 KO**

**mic are better protected from exhaustion compared to WT, related to Figure 5:**

(A) Image of spleens isolated from mice used in Hoechst pyronin Y assay (Figure 5A), confirming robust infection in the infected mice shown on the right; (1) WT naïve, (2) WT *M. avium*, (3) BST2 KO naïve, (4) BST2 KO *M. avium*. (B) Spleen weights (grams) from WT or BST2 KO mice that were chronically infected with *M. avium* for 16 weeks. (C-K) Absolute counts and percent of HSCs and progenitor populations in one tibia during chronic infection. (C) Percent LT-HSCs (LK CD150+ CD48- CD34-). (D) MPP1 count (LK CD150+ CD48- CD34+). (E) MPP2 count (LK CD150+ CD48+ CD34+). (F) MPP3

count (LK CD150- CD48+ CD34+). (G) MPP4 count (LK CD150- CD48+ Flk2+). \*\*\*\*p<0.0001, \*\*\*p<0.001, \*\*p<0.01, \*p<0.05, ns= not significant.

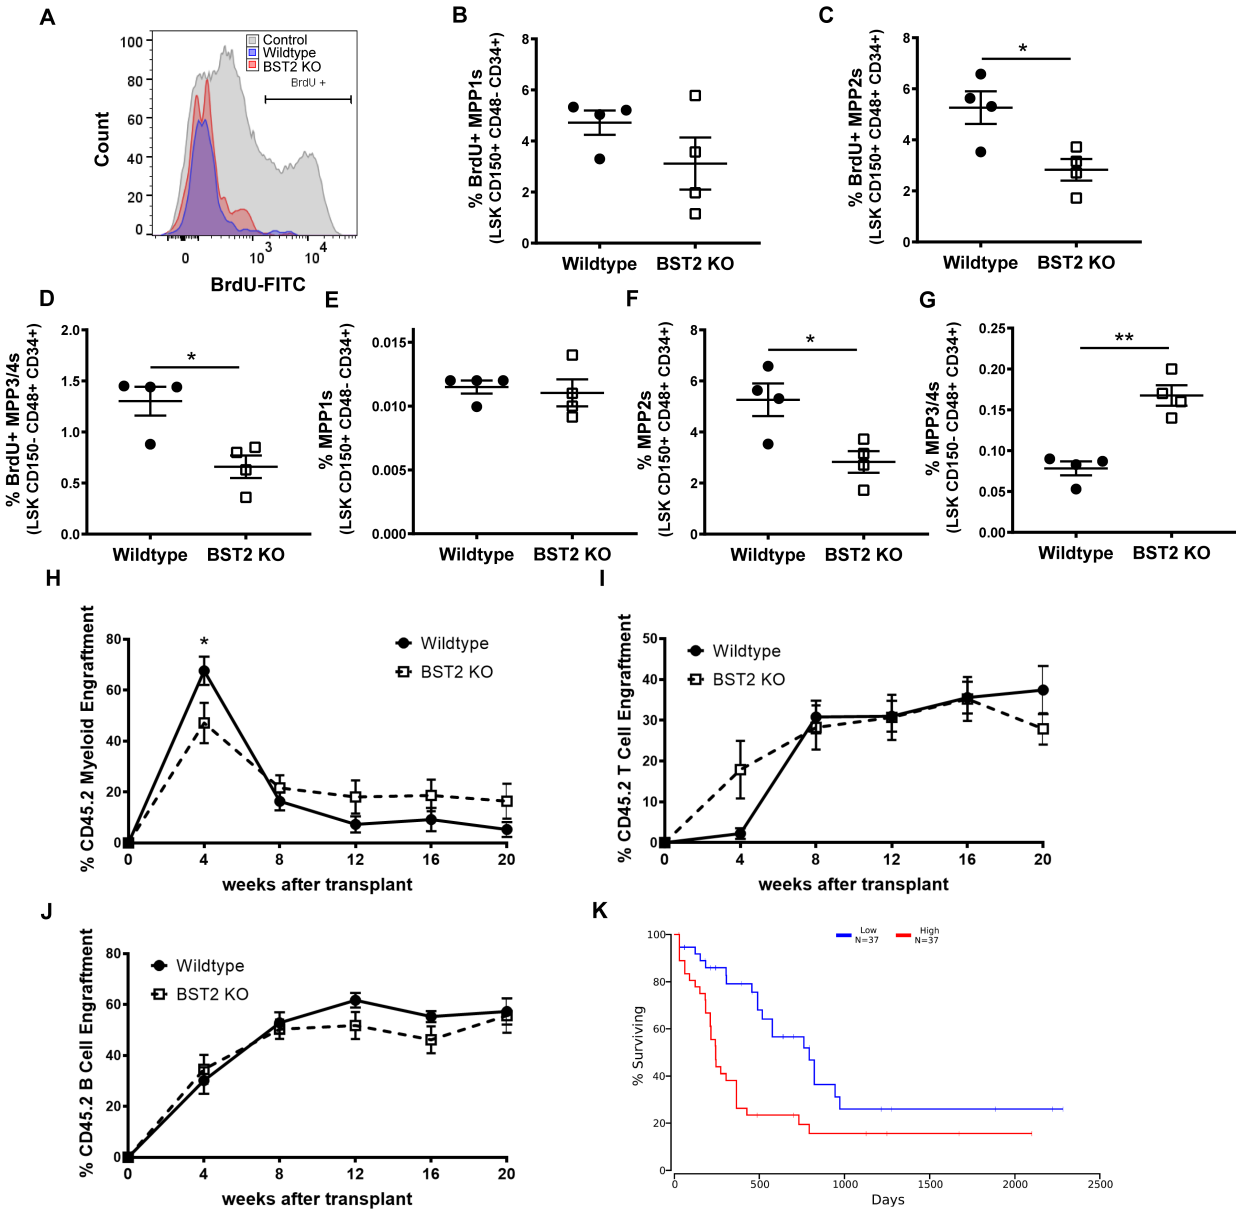

**Supplemental Figure 6. BST2 KO MPPs are hyperquiescent and more abundant than WT, related to Figure 6:**

(A) Representative flow plots of BrdU+ HSCs (LSK CD150+ CD48- CD34-) isolated from WT or *Bst2*<sup>-/-</sup> mice. (B-D) BrdU+ MPPs isolated from WT or *Bst2*<sup>-/-</sup> mice. Shown as % of total MPPs. n=4; Data are representative of 2 independent experiments. (B) MPP1s (LSK CD150+ CD48- CD34+). (C) MPP2s (LSK CD150+ CD48+ CD34+). (D)

MPP3/4s (LSK CD150<sup>-</sup> CD48<sup>+</sup> CD34<sup>+</sup>). (E-G) The number of MPPs in wildtype or *Bst2*<sup>-/-</sup> mice. Shown as % of live WBM cells. n=4; Data are representative of 4 independent experiments. (H-J) Lineage contribution to peripheral blood following transplant of WT or *Bst2*<sup>-/-</sup> WBM cells. 2x10<sup>5</sup> WBM cells from WT or *Bst2*<sup>-/-</sup> mice (CD45.2) were mixed with 2x10<sup>5</sup> rescue marrow (CD45.1) and transplanted into lethally irradiated mice. Shown as % of CD45.2 engrafted cells at 4, 8, 12, 16, and 20 weeks post-transplant. n=10. (H) Myeloid contribution (I) T cell contribution (J) B cell contribution. Data in (B-J) are presented as mean ± SEM. (K) Survival of AML patients with high or low BST2 expression. Graph was generated using OncoLnc with the upper and lower quartiles of BST2 expression in patients in the TCGA LAML dataset. N=37 in each quartile.
